# Supplementary material for: Quasi-stationary Strength of ECAP-processed Cu-Zr at 0.5Tm
Source: Preprints.org preprint supplement (doi:10.20944/preprints201909.0073.v1), 2019-09-06
Supplement: Supplementary file 1 [file supplementary]

%% This BibTeX bibliography file was created using BibDesk.
%% http://bibdesk.sourceforge.net/


%% Created for Wolfgang Blum at 2019-09-05 12:29:24 +0200 


%% Saved with string encoding Unicode (UTF-8) 


@article{EisBlu20Maximal-strain-rate,
	Annote = {in overleaf, dort jeweils neueste Version

manuscript ID: JMST-2019-2353},
	Author = {Eisenlohr, P. and Blum, W.},
	Date-Added = {2019-09-05 12:28:34 +0200},
	Date-Modified = {2019-09-05 12:28:34 +0200},
	Journal = {submitted to J. Mater. Sci. Technol.},
	Local-Url = {/Users/wblum/Documents/Texte/Publikationen/papers_In_Arbeit/EisBlu19MaxRateSensitivityClone},
	Title = {Maximal strain rate sensitivity of quasi-stationary deformation strength when subgrain size matches grain size},
	Year = {2020},
	Bdsk-File-1 = {YnBsaXN0MDDSAQIDBFxyZWxhdGl2ZVBhdGhZYWxpYXNEYXRhXxA/Li4vLi4vLi4vLi4vLi4vLi4vLi4vLi4vcGFwZXJzL0Vpc0JsdTIwTWF4aW1hbCBzdHJhaW4gcmF0ZS4ucGRmTxEBmgAAAAABmgACAAAMTWFjaW50b3NoIEhEAAAAAAAAAAAAAAAAAAAAAAAAAEJEAAH/////H0Vpc0JsdTIwTWF4aW1hbCBzdCNGRkZGRkZGRi5wZGYAAAAAAAAAAAAAAAAAAAAAAAAAAAAAAAAAAAAAAAAAAP////8AAAAAAAAAAAAAAAAACAACAAAKIGN1AAAAAAAAAAAAAAAAAAZwYXBlcnMAAgA/LzpVc2Vyczp3Ymx1bTpEb2N1bWVudHM6cGFwZXJzOkVpc0JsdTIwTWF4aW1hbCBzdHJhaW4gcmF0ZS4ucGRmAAAOAEIAIABFAGkAcwBCAGwAdQAyADAATQBhAHgAaQBtAGEAbAAgAHMAdAByAGEAaQBuACAAcgBhAHQAZQAuAC4AcABkAGYADwAaAAwATQBhAGMAaQBuAHQAbwBzAGgAIABIAEQAEgA9VXNlcnMvd2JsdW0vRG9jdW1lbnRzL3BhcGVycy9FaXNCbHUyME1heGltYWwgc3RyYWluIHJhdGUuLnBkZgAAEwABLwAAFQACAAz//wAAAAgADQAaACQAZgAAAAAAAAIBAAAAAAAAAAUAAAAAAAAAAAAAAAAAAAIE}}

@article{MuBiDo69,
	Author = {Mukherjee, A.K. and Bird, J.E. and Dorn, J.E.},
	Citation-Origin = {Blum},
	Date-Added = {2019-09-05 11:57:53 +0200},
	Date-Modified = {2019-09-05 11:57:53 +0200},
	Journal = {ASM Trans. Quart.},
	Pages = {155-179},
	Title = {Experimental Correlations for High-Temperature Creep},
	Volume = {62},
	Year = {1969}}

@article{BluZen11Corrigendum-to:-A-simple-dislocation,
	Author = {W. Blum and X. H. Zeng},
	Date-Added = {2019-09-05 11:57:11 +0200},
	Date-Modified = {2019-09-05 11:57:11 +0200},
	Doi = {10.1016/j.actamat.2011.05.032},
	Journal = {Acta Mater.},
	Pages = {6205--6206},
	Title = {Corrigendum to: ``{A} simple dislocation model of deformation resistance of ultrafine-grained materials explaining {H}all-{P}etch strengthening and enhanced strain rate sensitivity''},
	Volume = {59},
	Year = {2011},
	Bdsk-File-1 = {YnBsaXN0MDDSAQIDBFxyZWxhdGl2ZVBhdGhZYWxpYXNEYXRhXxBSLi4vLi4vLi4vLi4vLi4vLi4vLi4vLi4vcGFwZXJzL0JsdVplbjExYUNvcnJpZ2VuZHVtIHRvIGBgQSBzaW1wbGUgZGlzbG9jYXRpb24uLnBkZk8RAeQAAAAAAeQAAgAADE1hY2ludG9zaCBIRAAAAAAAAAAAAAAAAAAAAAAAAABCRAAB/////x9CbHVaZW4xMWFDb3JyaWdlbmQjRkZGRkZGRkYucGRmAAAAAAAAAAAAAAAAAAAAAAAAAAAAAAAAAAAAAAAAAAD/////AAAAAAAAAAAAAAAAAAgAAgAACiBjdQAAAAAAAAAAAAAAAAAGcGFwZXJzAAIAUi86VXNlcnM6d2JsdW06RG9jdW1lbnRzOnBhcGVyczpCbHVaZW4xMWFDb3JyaWdlbmR1bSB0byBgYEEgc2ltcGxlIGRpc2xvY2F0aW9uLi5wZGYADgBoADMAQgBsAHUAWgBlAG4AMQAxAGEAQwBvAHIAcgBpAGcAZQBuAGQAdQBtACAAdABvACAAYABgAEEAIABzAGkAbQBwAGwAZQAgAGQAaQBzAGwAbwBjAGEAdABpAG8AbgAuAC4AcABkAGYADwAaAAwATQBhAGMAaQBuAHQAbwBzAGgAIABIAEQAEgBQVXNlcnMvd2JsdW0vRG9jdW1lbnRzL3BhcGVycy9CbHVaZW4xMWFDb3JyaWdlbmR1bSB0byBgYEEgc2ltcGxlIGRpc2xvY2F0aW9uLi5wZGYAEwABLwAAFQACAAz//wAAAAgADQAaACQAeQAAAAAAAAIBAAAAAAAAAAUAAAAAAAAAAAAAAAAAAAJh},
	Bdsk-File-2 = {YnBsaXN0MDDSAQIDBFxyZWxhdGl2ZVBhdGhZYWxpYXNEYXRhXxBRLi4vLi4vLi4vLi4vLi4vLi4vLi4vLi4vcGFwZXJzL0JsdVplbjExQ29ycmlnZW5kdW0gdG8gYGBBIHNpbXBsZSBkaXNsb2NhdGlvbi4ucGRmTxEB4gAAAAAB4gACAAAMTWFjaW50b3NoIEhEAAAAAAAAAAAAAAAAAAAAAAAAAEJEAAH/////H0JsdVplbjExQ29ycmlnZW5kdSNGRkZGRkZGRi5wZGYAAAAAAAAAAAAAAAAAAAAAAAAAAAAAAAAAAAAAAAAAAP////8AAAAAAAAAAAAAAAAACAACAAAKIGN1AAAAAAAAAAAAAAAAAAZwYXBlcnMAAgBRLzpVc2Vyczp3Ymx1bTpEb2N1bWVudHM6cGFwZXJzOkJsdVplbjExQ29ycmlnZW5kdW0gdG8gYGBBIHNpbXBsZSBkaXNsb2NhdGlvbi4ucGRmAAAOAGYAMgBCAGwAdQBaAGUAbgAxADEAQwBvAHIAcgBpAGcAZQBuAGQAdQBtACAAdABvACAAYABgAEEAIABzAGkAbQBwAGwAZQAgAGQAaQBzAGwAbwBjAGEAdABpAG8AbgAuAC4AcABkAGYADwAaAAwATQBhAGMAaQBuAHQAbwBzAGgAIABIAEQAEgBPVXNlcnMvd2JsdW0vRG9jdW1lbnRzL3BhcGVycy9CbHVaZW4xMUNvcnJpZ2VuZHVtIHRvIGBgQSBzaW1wbGUgZGlzbG9jYXRpb24uLnBkZgAAEwABLwAAFQACAAz//wAAAAgADQAaACQAeAAAAAAAAAIBAAAAAAAAAAUAAAAAAAAAAAAAAAAAAAJe},
	Bdsk-File-3 = {YnBsaXN0MDDSAQIDBFxyZWxhdGl2ZVBhdGhZYWxpYXNEYXRhXxA5Li4vLi4vLi4vLi4vLi4vLi4vLi4vLi4vcGFwZXJzL0JsdVplbjExYS1wcm9vZi1jb3JyLTIucGRmTxEBggAAAAABggACAAAMTWFjaW50b3NoIEhEAAAAAAAAAAAAAAAAAAAAAAAAAEJEAAH/////GkJsdVplbjExYS1wcm9vZi1jb3JyLTIucGRmAAAAAAAAAAAAAAAAAAAAAAAAAAAAAAAAAAAAAAAAAAAAAAAAAP////8AAAAAUERGIENBUk8ACAACAAAKIGN1AAAAAAAAAAAAAAAAAAZwYXBlcnMAAgA5LzpVc2Vyczp3Ymx1bTpEb2N1bWVudHM6cGFwZXJzOkJsdVplbjExYS1wcm9vZi1jb3JyLTIucGRmAAAOADYAGgBCAGwAdQBaAGUAbgAxADEAYQAtAHAAcgBvAG8AZgAtAGMAbwByAHIALQAyAC4AcABkAGYADwAaAAwATQBhAGMAaQBuAHQAbwBzAGgAIABIAEQAEgA3VXNlcnMvd2JsdW0vRG9jdW1lbnRzL3BhcGVycy9CbHVaZW4xMWEtcHJvb2YtY29yci0yLnBkZgAAEwABLwAAFQACAAz//wAAAAgADQAaACQAYAAAAAAAAAIBAAAAAAAAAAUAAAAAAAAAAAAAAAAAAAHm},
	Bdsk-File-4 = {YnBsaXN0MDDSAQIDBFxyZWxhdGl2ZVBhdGhZYWxpYXNEYXRhXxA5Li4vLi4vLi4vLi4vLi4vLi4vLi4vLi4vcGFwZXJzL0JsdVplbjExYS1wcm9vZi1jb3JyLTEucGRmTxEBggAAAAABggACAAAMTWFjaW50b3NoIEhEAAAAAAAAAAAAAAAAAAAAAAAAAEJEAAH/////GkJsdVplbjExYS1wcm9vZi1jb3JyLTEucGRmAAAAAAAAAAAAAAAAAAAAAAAAAAAAAAAAAAAAAAAAAAAAAAAAAP////8AAAAAUERGIENBUk8ACAACAAAKIGN1AAAAAAAAAAAAAAAAAAZwYXBlcnMAAgA5LzpVc2Vyczp3Ymx1bTpEb2N1bWVudHM6cGFwZXJzOkJsdVplbjExYS1wcm9vZi1jb3JyLTEucGRmAAAOADYAGgBCAGwAdQBaAGUAbgAxADEAYQAtAHAAcgBvAG8AZgAtAGMAbwByAHIALQAxAC4AcABkAGYADwAaAAwATQBhAGMAaQBuAHQAbwBzAGgAIABIAEQAEgA3VXNlcnMvd2JsdW0vRG9jdW1lbnRzL3BhcGVycy9CbHVaZW4xMWEtcHJvb2YtY29yci0xLnBkZgAAEwABLwAAFQACAAz//wAAAAgADQAaACQAYAAAAAAAAAIBAAAAAAAAAAUAAAAAAAAAAAAAAAAAAAHm},
	Bdsk-File-5 = {YnBsaXN0MDDSAQIDBFxyZWxhdGl2ZVBhdGhZYWxpYXNEYXRhXxAyLi4vLi4vLi4vLi4vLi4vLi4vLi4vLi4vcGFwZXJzL0JsdVplbjExRXJyYXR1bS5wZGZPEQFkAAAAAAFkAAIAAAxNYWNpbnRvc2ggSEQAAAAAAAAAAAAAAAAAAAAAAAAAQkQAAf////8TQmx1WmVuMTFFcnJhdHVtLnBkZgAAAAAAAAAAAAAAAAAAAAAAAAAAAAAAAAAAAAAAAAAAAAAAAAAAAAAAAAAA/////wAAAAAAAAAAAAAAAAAIAAIAAAogY3UAAAAAAAAAAAAAAAAABnBhcGVycwACADIvOlVzZXJzOndibHVtOkRvY3VtZW50czpwYXBlcnM6Qmx1WmVuMTFFcnJhdHVtLnBkZgAOACgAEwBCAGwAdQBaAGUAbgAxADEARQByAHIAYQB0AHUAbQAuAHAAZABmAA8AGgAMAE0AYQBjAGkAbgB0AG8AcwBoACAASABEABIAMFVzZXJzL3dibHVtL0RvY3VtZW50cy9wYXBlcnMvQmx1WmVuMTFFcnJhdHVtLnBkZgATAAEvAAAVAAIADP//AAAACAANABoAJABZAAAAAAAAAgEAAAAAAAAABQAAAAAAAAAAAAAAAAAAAcE=},
	Bdsk-Url-1 = {http://dx.doi.org/10.1016/j.actamat.2011.05.032}}

@article{BluZen09,
	Author = {W. Blum and X. H. Zeng},
	Date-Added = {2019-09-05 11:56:36 +0200},
	Date-Modified = {2019-09-05 11:56:36 +0200},
	Doi = {10.1016/j.actamat.2008.12.041},
	Issn = {1359-6454},
	Journal = {Acta Mater.},
	Pages = {1966-1974},
	Title = {A simple dislocation model of deformation resistance of ultrafine-grained materials explaining {H}all--{P}etch strengthening and enhanced strain rate sensitivity},
	Volume = {57},
	Year = {2009},
	Bdsk-File-1 = {YnBsaXN0MDDSAQIDBFxyZWxhdGl2ZVBhdGhZYWxpYXNEYXRhXxArLi4vLi4vLi4vLi4vLi4vLi4vLi4vLi4vcGFwZXJzL0JsdVplbjA5LnBkZk8RAUoAAAAAAUoAAgAADE1hY2ludG9zaCBIRAAAAAAAAAAAAAAAAAAAAAAAAABCRAAB/////wxCbHVaZW4wOS5wZGYAAAAAAAAAAAAAAAAAAAAAAAAAAAAAAAAAAAAAAAAAAAAAAAAAAAAAAAAAAAAAAAAAAAD/////AAAAAAAAAAAAAAAAAAgAAgAACiBjdQAAAAAAAAAAAAAAAAAGcGFwZXJzAAIAKy86VXNlcnM6d2JsdW06RG9jdW1lbnRzOnBhcGVyczpCbHVaZW4wOS5wZGYAAA4AGgAMAEIAbAB1AFoAZQBuADAAOQAuAHAAZABmAA8AGgAMAE0AYQBjAGkAbgB0AG8AcwBoACAASABEABIAKVVzZXJzL3dibHVtL0RvY3VtZW50cy9wYXBlcnMvQmx1WmVuMDkucGRmAAATAAEvAAAVAAIADP//AAAACAANABoAJABSAAAAAAAAAgEAAAAAAAAABQAAAAAAAAAAAAAAAAAAAaA=},
	Bdsk-Url-1 = {http://dx.doi.org/10.1016/j.actamat.2008.12.041}}

@article{BluDvoKra18Dynamic-grain-coarsening,
	Annote = {Manuscript number MSA 36464},
	Author = {W. Blum and J. Dvo\v{r}\'ak and P. Kr\'al and V. Skleni\v{c}ka},
	Date-Added = {2019-09-05 11:56:03 +0200},
	Date-Modified = {2019-09-05 11:56:03 +0200},
	Doi = {https://doi.org/10.1016/j.msea.2018.05.026},
	Journal = {Mater. Sci. Eng. A},
	Local-Url = {/Users/wblum/Documents/Texte/Publikationen/papers_In_Arbeit/Sklenicka2011/Cu/paper573/paper573insitu/submission-new/pCu573-in situ-5.pdf},
	Pages = {520--529},
	Title = {Dynamic grain coarsening in creep of pure Cu at 0.42 Tm after predeformation by ECAP},
	Volume = {731},
	Year = {2018},
	Bdsk-File-1 = {YnBsaXN0MDDSAQIDBFxyZWxhdGl2ZVBhdGhZYWxpYXNEYXRhXxBILi4vLi4vLi4vLi4vLi4vLi4vLi4vLi4vcGFwZXJzL0JsdUR2b0tyYTE4ZER5bmFtaWMgZ3JhaW4gY29hcnNlbmluZy4ucGRmTxEBvAAAAAABvAACAAAMTWFjaW50b3NoIEhEAAAAAAAAAAAAAAAAAAAAAAAAAEJEAAH/////H0JsdUR2b0tyYTE4ZER5bmFtaSNGRkZGRkZGRi5wZGYAAAAAAAAAAAAAAAAAAAAAAAAAAAAAAAAAAAAAAAAAAP////8AAAAAAAAAAAAAAAAACAACAAAKIGN1AAAAAAAAAAAAAAAAAAZwYXBlcnMAAgBILzpVc2Vyczp3Ymx1bTpEb2N1bWVudHM6cGFwZXJzOkJsdUR2b0tyYTE4ZER5bmFtaWMgZ3JhaW4gY29hcnNlbmluZy4ucGRmAA4AVAApAEIAbAB1AEQAdgBvAEsAcgBhADEAOABkAEQAeQBuAGEAbQBpAGMAIABnAHIAYQBpAG4AIABjAG8AYQByAHMAZQBuAGkAbgBnAC4ALgBwAGQAZgAPABoADABNAGEAYwBpAG4AdABvAHMAaAAgAEgARAASAEZVc2Vycy93Ymx1bS9Eb2N1bWVudHMvcGFwZXJzL0JsdUR2b0tyYTE4ZER5bmFtaWMgZ3JhaW4gY29hcnNlbmluZy4ucGRmABMAAS8AABUAAgAM//8AAAAIAA0AGgAkAG8AAAAAAAACAQAAAAAAAAAFAAAAAAAAAAAAAAAAAAACLw==},
	Bdsk-File-2 = {YnBsaXN0MDDSAQIDBFxyZWxhdGl2ZVBhdGhZYWxpYXNEYXRhXxBILi4vLi4vLi4vLi4vLi4vLi4vLi4vLi4vcGFwZXJzL0JsdUR2b0tyYTE4ZER5bmFtaWMgZ3JhaW4gY29hcnNlbmluZy4ucGRmTxEBvAAAAAABvAACAAAMTWFjaW50b3NoIEhEAAAAAAAAAAAAAAAAAAAAAAAAAEJEAAH/////H0JsdUR2b0tyYTE4ZER5bmFtaSNGRkZGRkZGRi5wZGYAAAAAAAAAAAAAAAAAAAAAAAAAAAAAAAAAAAAAAAAAAP////8AAAAAAAAAAAAAAAAACAACAAAKIGN1AAAAAAAAAAAAAAAAAAZwYXBlcnMAAgBILzpVc2Vyczp3Ymx1bTpEb2N1bWVudHM6cGFwZXJzOkJsdUR2b0tyYTE4ZER5bmFtaWMgZ3JhaW4gY29hcnNlbmluZy4ucGRmAA4AVAApAEIAbAB1AEQAdgBvAEsAcgBhADEAOABkAEQAeQBuAGEAbQBpAGMAIABnAHIAYQBpAG4AIABjAG8AYQByAHMAZQBuAGkAbgBnAC4ALgBwAGQAZgAPABoADABNAGEAYwBpAG4AdABvAHMAaAAgAEgARAASAEZVc2Vycy93Ymx1bS9Eb2N1bWVudHMvcGFwZXJzL0JsdUR2b0tyYTE4ZER5bmFtaWMgZ3JhaW4gY29hcnNlbmluZy4ucGRmABMAAS8AABUAAgAM//8AAAAIAA0AGgAkAG8AAAAAAAACAQAAAAAAAAAFAAAAAAAAAAAAAAAAAAACLw==},
	Bdsk-File-3 = {YnBsaXN0MDDSAQIDBFxyZWxhdGl2ZVBhdGhZYWxpYXNEYXRhXxBKLi4vLi4vLi4vLi4vLi4vLi4vLi4vLi4vcGFwZXJzL0JsdUR2b0tyYTE4LVIxRHluYW1pYyBncmFpbiBjb2Fyc2VuaW5nLi5wZGZPEQHEAAAAAAHEAAIAAAxNYWNpbnRvc2ggSEQAAAAAAAAAAAAAAAAAAAAAAAAAQkQAAf////8fQmx1RHZvS3JhMTgtUjFEeW5hI0ZGRkZGRkZGLnBkZgAAAAAAAAAAAAAAAAAAAAAAAAAAAAAAAAAAAAAAAAAA/////wAAAAAAAAAAAAAAAAAIAAIAAAogY3UAAAAAAAAAAAAAAAAABnBhcGVycwACAEovOlVzZXJzOndibHVtOkRvY3VtZW50czpwYXBlcnM6Qmx1RHZvS3JhMTgtUjFEeW5hbWljIGdyYWluIGNvYXJzZW5pbmcuLnBkZgAOAFgAKwBCAGwAdQBEAHYAbwBLAHIAYQAxADgALQBSADEARAB5AG4AYQBtAGkAYwAgAGcAcgBhAGkAbgAgAGMAbwBhAHIAcwBlAG4AaQBuAGcALgAuAHAAZABmAA8AGgAMAE0AYQBjAGkAbgB0AG8AcwBoACAASABEABIASFVzZXJzL3dibHVtL0RvY3VtZW50cy9wYXBlcnMvQmx1RHZvS3JhMTgtUjFEeW5hbWljIGdyYWluIGNvYXJzZW5pbmcuLnBkZgATAAEvAAAVAAIADP//AAAACAANABoAJABxAAAAAAAAAgEAAAAAAAAABQAAAAAAAAAAAAAAAAAAAjk=},
	Bdsk-File-4 = {YnBsaXN0MDDSAQIDBFxyZWxhdGl2ZVBhdGhZYWxpYXNEYXRhXxBHLi4vLi4vLi4vLi4vLi4vLi4vLi4vLi4vcGFwZXJzL0JsdUR2b0tyYTE4RHluYW1pYyBncmFpbiBjb2Fyc2VuaW5nLi5wZGZPEQG6AAAAAAG6AAIAAAxNYWNpbnRvc2ggSEQAAAAAAAAAAAAAAAAAAAAAAAAAQkQAAf////8fQmx1RHZvS3JhMThEeW5hbWljI0ZGRkZGRkZGLnBkZgAAAAAAAAAAAAAAAAAAAAAAAAAAAAAAAAAAAAAAAAAA/////wAAAAAAAAAAAAAAAAAIAAIAAAogY3UAAAAAAAAAAAAAAAAABnBhcGVycwACAEcvOlVzZXJzOndibHVtOkRvY3VtZW50czpwYXBlcnM6Qmx1RHZvS3JhMThEeW5hbWljIGdyYWluIGNvYXJzZW5pbmcuLnBkZgAADgBSACgAQgBsAHUARAB2AG8ASwByAGEAMQA4AEQAeQBuAGEAbQBpAGMAIABnAHIAYQBpAG4AIABjAG8AYQByAHMAZQBuAGkAbgBnAC4ALgBwAGQAZgAPABoADABNAGEAYwBpAG4AdABvAHMAaAAgAEgARAASAEVVc2Vycy93Ymx1bS9Eb2N1bWVudHMvcGFwZXJzL0JsdUR2b0tyYTE4RHluYW1pYyBncmFpbiBjb2Fyc2VuaW5nLi5wZGYAABMAAS8AABUAAgAM//8AAAAIAA0AGgAkAG4AAAAAAAACAQAAAAAAAAAFAAAAAAAAAAAAAAAAAAACLA==}}

@article{BluDvoKra14Effect-of-grain-refinement,
	Author = {Blum, W. and Dvo{\v r}{\'a}k, J. and Kr\'al, P. and Eisenlohr, P. and Skleni\v{c}ka, V.},
	Date-Added = {2019-09-05 11:54:51 +0200},
	Date-Modified = {2019-09-05 11:54:51 +0200},
	Doi = {10.1016/j.msea.2013.10.022},
	Journal = {Mater. Sci. Eng. A},
	Keywords = {mc Cu, 473 K},
	Local-Url = {file://localhost/Users/wblum/Documents/Texte/Publikationen/papers_In_Arbeit/Sklenicka2011/Cu/paper473},
	Pages = {423-432},
	Title = {Effect of grain refinement by {ECAP} on creep of pure {C}u},
	Volume = {590},
	Year = {2014},
	Bdsk-File-1 = {YnBsaXN0MDDSAQIDBFxyZWxhdGl2ZVBhdGhZYWxpYXNEYXRhXxBJLi4vLi4vLi4vLi4vLi4vLi4vLi4vLi4vcGFwZXJzL0JsdUR2b0tyYTE0YkVmZmVjdCBvZiBncmFpbiByZWZpbmVtZW50LnBkZk8RAcIAAAAAAcIAAgAADE1hY2ludG9zaCBIRAAAAAAAAAAAAAAAAAAAAAAAAABCRAAB/////x9CbHVEdm9LcmExNGJFZmZlY3QjRkZGRkZGRkYucGRmAAAAAAAAAAAAAAAAAAAAAAAAAAAAAAAAAAAAAAAAAAD/////AAAAAAAAAAAAAAAAAAgAAgAACiBjdQAAAAAAAAAAAAAAAAAGcGFwZXJzAAIASS86VXNlcnM6d2JsdW06RG9jdW1lbnRzOnBhcGVyczpCbHVEdm9LcmExNGJFZmZlY3Qgb2YgZ3JhaW4gcmVmaW5lbWVudC5wZGYAAA4AVgAqAEIAbAB1AEQAdgBvAEsAcgBhADEANABiAEUAZgBmAGUAYwB0ACAAbwBmACAAZwByAGEAaQBuACAAcgBlAGYAaQBuAGUAbQBlAG4AdAAuAHAAZABmAA8AGgAMAE0AYQBjAGkAbgB0AG8AcwBoACAASABEABIAR1VzZXJzL3dibHVtL0RvY3VtZW50cy9wYXBlcnMvQmx1RHZvS3JhMTRiRWZmZWN0IG9mIGdyYWluIHJlZmluZW1lbnQucGRmAAATAAEvAAAVAAIADP//AAAACAANABoAJABwAAAAAAAAAgEAAAAAAAAABQAAAAAAAAAAAAAAAAAAAjY=},
	Bdsk-File-2 = {YnBsaXN0MDDSAQIDBFxyZWxhdGl2ZVBhdGhZYWxpYXNEYXRhXxBLLi4vLi4vLi4vLi4vLi4vLi4vLi4vLi4vcGFwZXJzL0JsdUR2b0tyYTE0YUVmZmVjdCBvZiBncmFpbiByZWZpbmVtZW50LWEucGRmTxEBygAAAAABygACAAAMTWFjaW50b3NoIEhEAAAAAAAAAAAAAAAAAAAAAAAAAEJEAAH/////H0JsdUR2b0tyYTE0YUVmZmVjdCNGRkZGRkZGRi5wZGYAAAAAAAAAAAAAAAAAAAAAAAAAAAAAAAAAAAAAAAAAAP////8AAAAAAAAAAAAAAAAACAACAAAKIGN1AAAAAAAAAAAAAAAAAAZwYXBlcnMAAgBLLzpVc2Vyczp3Ymx1bTpEb2N1bWVudHM6cGFwZXJzOkJsdUR2b0tyYTE0YUVmZmVjdCBvZiBncmFpbiByZWZpbmVtZW50LWEucGRmAAAOAFoALABCAGwAdQBEAHYAbwBLAHIAYQAxADQAYQBFAGYAZgBlAGMAdAAgAG8AZgAgAGcAcgBhAGkAbgAgAHIAZQBmAGkAbgBlAG0AZQBuAHQALQBhAC4AcABkAGYADwAaAAwATQBhAGMAaQBuAHQAbwBzAGgAIABIAEQAEgBJVXNlcnMvd2JsdW0vRG9jdW1lbnRzL3BhcGVycy9CbHVEdm9LcmExNGFFZmZlY3Qgb2YgZ3JhaW4gcmVmaW5lbWVudC1hLnBkZgAAEwABLwAAFQACAAz//wAAAAgADQAaACQAcgAAAAAAAAIBAAAAAAAAAAUAAAAAAAAAAAAAAAAAAAJA},
	Bdsk-File-3 = {YnBsaXN0MDDSAQIDBFxyZWxhdGl2ZVBhdGhZYWxpYXNEYXRhXxBLLi4vLi4vLi4vLi4vLi4vLi4vLi4vLi4vcGFwZXJzL0JsdUR2b0tyYTE0UjFFZmZlY3Qgb2YgZ3JhaW4gcmVmaW5lbWVudC4ucGRmTxEBygAAAAABygACAAAMTWFjaW50b3NoIEhEAAAAAAAAAAAAAAAAAAAAAAAAAEJEAAH/////H0JsdUR2b0tyYTE0UjFFZmZlYyNGRkZGRkZGRi5wZGYAAAAAAAAAAAAAAAAAAAAAAAAAAAAAAAAAAAAAAAAAAP////8AAAAAAAAAAAAAAAAACAACAAAKIGN1AAAAAAAAAAAAAAAAAAZwYXBlcnMAAgBLLzpVc2Vyczp3Ymx1bTpEb2N1bWVudHM6cGFwZXJzOkJsdUR2b0tyYTE0UjFFZmZlY3Qgb2YgZ3JhaW4gcmVmaW5lbWVudC4ucGRmAAAOAFoALABCAGwAdQBEAHYAbwBLAHIAYQAxADQAUgAxAEUAZgBmAGUAYwB0ACAAbwBmACAAZwByAGEAaQBuACAAcgBlAGYAaQBuAGUAbQBlAG4AdAAuAC4AcABkAGYADwAaAAwATQBhAGMAaQBuAHQAbwBzAGgAIABIAEQAEgBJVXNlcnMvd2JsdW0vRG9jdW1lbnRzL3BhcGVycy9CbHVEdm9LcmExNFIxRWZmZWN0IG9mIGdyYWluIHJlZmluZW1lbnQuLnBkZgAAEwABLwAAFQACAAz//wAAAAgADQAaACQAcgAAAAAAAAIBAAAAAAAAAAUAAAAAAAAAAAAAAAAAAAJA},
	Bdsk-File-4 = {YnBsaXN0MDDSAQIDBFxyZWxhdGl2ZVBhdGhZYWxpYXNEYXRhXxBJLi4vLi4vLi4vLi4vLi4vLi4vLi4vLi4vcGFwZXJzL0JsdUR2b0tyYTE0RWZmZWN0IG9mIGdyYWluIHJlZmluZW1lbnQuLnBkZk8RAcIAAAAAAcIAAgAADE1hY2ludG9zaCBIRAAAAAAAAAAAAAAAAAAAAAAAAABCRAAB/////x9CbHVEdm9LcmExNEVmZmVjdCAjRkZGRkZGRkYucGRmAAAAAAAAAAAAAAAAAAAAAAAAAAAAAAAAAAAAAAAAAAD/////AAAAAAAAAAAAAAAAAAgAAgAACiBjdQAAAAAAAAAAAAAAAAAGcGFwZXJzAAIASS86VXNlcnM6d2JsdW06RG9jdW1lbnRzOnBhcGVyczpCbHVEdm9LcmExNEVmZmVjdCBvZiBncmFpbiByZWZpbmVtZW50Li5wZGYAAA4AVgAqAEIAbAB1AEQAdgBvAEsAcgBhADEANABFAGYAZgBlAGMAdAAgAG8AZgAgAGcAcgBhAGkAbgAgAHIAZQBmAGkAbgBlAG0AZQBuAHQALgAuAHAAZABmAA8AGgAMAE0AYQBjAGkAbgB0AG8AcwBoACAASABEABIAR1VzZXJzL3dibHVtL0RvY3VtZW50cy9wYXBlcnMvQmx1RHZvS3JhMTRFZmZlY3Qgb2YgZ3JhaW4gcmVmaW5lbWVudC4ucGRmAAATAAEvAAAVAAIADP//AAAACAANABoAJABwAAAAAAAAAgEAAAAAAAAABQAAAAAAAAAAAAAAAAAAAjY=}}

@article{GhoRaj81Grain-size-distribution,
	Author = {A. K. Ghosh and R. Raj},
	Date-Added = {2019-09-05 11:54:07 +0200},
	Date-Modified = {2019-09-05 11:54:07 +0200},
	Journal = {Acta metall.},
	Pages = {607-616},
	Title = {Grain size distribution effects in superplasticity},
	Volume = {29},
	Year = {1981},
	Bdsk-File-1 = {YnBsaXN0MDDSAQIDBFxyZWxhdGl2ZVBhdGhZYWxpYXNEYXRhXxBDLi4vLi4vLi4vLi4vLi4vLi4vLi4vLi4vcGFwZXJzL0dob1JhajgxR3JhaW4gc2l6ZSBkaXN0cmlidXRpb24uLnBkZk8RAaoAAAAAAaoAAgAADE1hY2ludG9zaCBIRAAAAAAAAAAAAAAAAAAAAAAAAABCRAAB/////x9HaG9SYWo4MUdyYWluIHNpemUjRkZGRkZGRkYucGRmAAAAAAAAAAAAAAAAAAAAAAAAAAAAAAAAAAAAAAAAAAD/////AAAAAAAAAAAAAAAAAAgAAgAACiBjdQAAAAAAAAAAAAAAAAAGcGFwZXJzAAIAQy86VXNlcnM6d2JsdW06RG9jdW1lbnRzOnBhcGVyczpHaG9SYWo4MUdyYWluIHNpemUgZGlzdHJpYnV0aW9uLi5wZGYAAA4ASgAkAEcAaABvAFIAYQBqADgAMQBHAHIAYQBpAG4AIABzAGkAegBlACAAZABpAHMAdAByAGkAYgB1AHQAaQBvAG4ALgAuAHAAZABmAA8AGgAMAE0AYQBjAGkAbgB0AG8AcwBoACAASABEABIAQVVzZXJzL3dibHVtL0RvY3VtZW50cy9wYXBlcnMvR2hvUmFqODFHcmFpbiBzaXplIGRpc3RyaWJ1dGlvbi4ucGRmAAATAAEvAAAVAAIADP//AAAACAANABoAJABqAAAAAAAAAgEAAAAAAAAABQAAAAAAAAAAAAAAAAAAAhg=}}

@incollection{BluEis10A-simple-dislocation-model,
	Annote = {	
012136 geht nicht ins System},
	Author = {W. Blum and P. Eisenlohr},
	Booktitle = {15th International Conference on the Strength of Materials (ICSMA-15)},
	Date-Added = {2019-09-05 11:53:38 +0200},
	Date-Modified = {2019-09-05 11:53:38 +0200},
	Doi = {10.1088/1742-6596/240/1/012136},
	Journal = {Journal of Physics: Conference Series},
	Pages = {1-4},
	Publisher = {IOP Publishing},
	Title = {A simple dislocation model of the influence of high-angle boundaries on the deformation behavior of ultrafine-grained materials},
	Url = {http://herald.iop.org/branding/m97/lt/325733/link/3795},
	Volume = {240},
	Year = {2010},
	Bdsk-File-1 = {YnBsaXN0MDDSAQIDBFxyZWxhdGl2ZVBhdGhZYWxpYXNEYXRhXxBHLi4vLi4vLi4vLi4vLi4vLi4vLi4vLi4vcGFwZXJzL0JsdUVpczEwYkEgc2ltcGxlIGRpc2xvY2F0aW9uIG1vZGVsLi5wZGZPEQG6AAAAAAG6AAIAAAxNYWNpbnRvc2ggSEQAAAAAAAAAAAAAAAAAAAAAAAAAQkQAAf////8fQmx1RWlzMTBiQSBzaW1wbGUgI0ZGRkZGRkZGLnBkZgAAAAAAAAAAAAAAAAAAAAAAAAAAAAAAAAAAAAAAAAAA/////wAAAAAAAAAAAAAAAAAIAAIAAAogY3UAAAAAAAAAAAAAAAAABnBhcGVycwACAEcvOlVzZXJzOndibHVtOkRvY3VtZW50czpwYXBlcnM6Qmx1RWlzMTBiQSBzaW1wbGUgZGlzbG9jYXRpb24gbW9kZWwuLnBkZgAADgBSACgAQgBsAHUARQBpAHMAMQAwAGIAQQAgAHMAaQBtAHAAbABlACAAZABpAHMAbABvAGMAYQB0AGkAbwBuACAAbQBvAGQAZQBsAC4ALgBwAGQAZgAPABoADABNAGEAYwBpAG4AdABvAHMAaAAgAEgARAASAEVVc2Vycy93Ymx1bS9Eb2N1bWVudHMvcGFwZXJzL0JsdUVpczEwYkEgc2ltcGxlIGRpc2xvY2F0aW9uIG1vZGVsLi5wZGYAABMAAS8AABUAAgAM//8AAAAIAA0AGgAkAG4AAAAAAAACAQAAAAAAAAAFAAAAAAAAAAAAAAAAAAACLA==},
	Bdsk-File-2 = {YnBsaXN0MDDSAQIDBFxyZWxhdGl2ZVBhdGhZYWxpYXNEYXRhXxBGLi4vLi4vLi4vLi4vLi4vLi4vLi4vLi4vcGFwZXJzL0JsdUVpczEwQSBzaW1wbGUgZGlzbG9jYXRpb24gbW9kZWwuLnBkZk8RAbQAAAAAAbQAAgAADE1hY2ludG9zaCBIRAAAAAAAAAAAAAAAAAAAAAAAAABCRAAB/////x9CbHVFaXMxMEEgc2ltcGxlIGQjRkZGRkZGRkYucGRmAAAAAAAAAAAAAAAAAAAAAAAAAAAAAAAAAAAAAAAAAAD/////AAAAAAAAAAAAAAAAAAgAAgAACiBjdQAAAAAAAAAAAAAAAAAGcGFwZXJzAAIARi86VXNlcnM6d2JsdW06RG9jdW1lbnRzOnBhcGVyczpCbHVFaXMxMEEgc2ltcGxlIGRpc2xvY2F0aW9uIG1vZGVsLi5wZGYADgBQACcAQgBsAHUARQBpAHMAMQAwAEEAIABzAGkAbQBwAGwAZQAgAGQAaQBzAGwAbwBjAGEAdABpAG8AbgAgAG0AbwBkAGUAbAAuAC4AcABkAGYADwAaAAwATQBhAGMAaQBuAHQAbwBzAGgAIABIAEQAEgBEVXNlcnMvd2JsdW0vRG9jdW1lbnRzL3BhcGVycy9CbHVFaXMxMEEgc2ltcGxlIGRpc2xvY2F0aW9uIG1vZGVsLi5wZGYAEwABLwAAFQACAAz//wAAAAgADQAaACQAbQAAAAAAAAIBAAAAAAAAAAUAAAAAAAAAAAAAAAAAAAIl},
	Bdsk-File-3 = {YnBsaXN0MDDSAQIDBFxyZWxhdGl2ZVBhdGhZYWxpYXNEYXRhXxBHLi4vLi4vLi4vLi4vLi4vLi4vLi4vLi4vcGFwZXJzL0JsdUVpczEwYUEgc2ltcGxlIGRpc2xvY2F0aW9uIG1vZGVsLi5wZGZPEQG6AAAAAAG6AAIAAAxNYWNpbnRvc2ggSEQAAAAAAAAAAAAAAAAAAAAAAAAAQkQAAf////8fQmx1RWlzMTBhQSBzaW1wbGUgI0ZGRkZGRkZGLnBkZgAAAAAAAAAAAAAAAAAAAAAAAAAAAAAAAAAAAAAAAAAA/////wAAAAAAAAAAAAAAAAAIAAIAAAogY3UAAAAAAAAAAAAAAAAABnBhcGVycwACAEcvOlVzZXJzOndibHVtOkRvY3VtZW50czpwYXBlcnM6Qmx1RWlzMTBhQSBzaW1wbGUgZGlzbG9jYXRpb24gbW9kZWwuLnBkZgAADgBSACgAQgBsAHUARQBpAHMAMQAwAGEAQQAgAHMAaQBtAHAAbABlACAAZABpAHMAbABvAGMAYQB0AGkAbwBuACAAbQBvAGQAZQBsAC4ALgBwAGQAZgAPABoADABNAGEAYwBpAG4AdABvAHMAaAAgAEgARAASAEVVc2Vycy93Ymx1bS9Eb2N1bWVudHMvcGFwZXJzL0JsdUVpczEwYUEgc2ltcGxlIGRpc2xvY2F0aW9uIG1vZGVsLi5wZGYAABMAAS8AABUAAgAM//8AAAAIAA0AGgAkAG4AAAAAAAACAQAAAAAAAAAFAAAAAAAAAAAAAAAAAAACLA==}}

@article{LiMueHop07,
	Annote = {249},
	Author = {Y. J. Li and J. Mueller and H.W. H{\"o}ppel and M. G{\"o}ken and W. Blum},
	Date-Added = {2019-09-05 11:51:54 +0200},
	Date-Modified = {2019-09-05 11:51:54 +0200},
	Doi = {10.1016/ j.actamat.2007.06.036},
	Journal = {Acta mater.},
	Keywords = {nc Ni, activation volume},
	Local-Url = {file:///.file/id=6571367.7962458/},
	Pages = {5708-5717},
	Title = {Deformation kinetics of nanocrystalline nickel},
	Volume = {55},
	Year = {2007},
	Bdsk-File-1 = {YnBsaXN0MDDSAQIDBFxyZWxhdGl2ZVBhdGhZYWxpYXNEYXRhbxAuAC4ALgAvAC4ALgAvAC4ALgAvAC4ALgAvAC4ALgAvAC4ALgAvAC4ALgAvAC4ALgAvAHAAYQBwAGUAcgBzAC8ATABpAE0AdQBlAEgAbwMIAHAAMAA3AC4AcABkAGZPEQFYAAAAAAFYAAIAAAxNYWNpbnRvc2ggSEQAAAAAAAAAAAAAAAAAAAAAAAAAQkQAAf////8OTGlNdWVImnAwNy5wZGYAAAAAAAAAAAAAAAAAAAAAAAAAAAAAAAAAAAAAAAAAAAAAAAAAAAAAAAAAAAAAAAAA/////wAAAABQREYgQ0FSTwAIAAIAAAogY3UAAAAAAAAAAAAAAAAABnBhcGVycwACAC8vOlVzZXJzOndibHVtOkRvY3VtZW50czpwYXBlcnM6TGlNdWVIb8yIcDA3LnBkZgAADgAgAA8ATABpAE0AdQBlAEgAbwMIAHAAMAA3AC4AcABkAGYADwAaAAwATQBhAGMAaQBuAHQAbwBzAGgAIABIAEQAEgAtVXNlcnMvd2JsdW0vRG9jdW1lbnRzL3BhcGVycy9MaU11ZUhvzIhwMDcucGRmAAATAAEvAAAVAAIADP//AAAACAANABoAJACDAAAAAAAAAgEAAAAAAAAABQAAAAAAAAAAAAAAAAAAAd8=},
	Bdsk-Url-1 = {http://dx.doi.org/10.1016/%20j.actamat.2007.06.036}}

@inproceedings{Bl93,
	Address = {Weinheim},
	Annote = {80,Bl93,3/93},
	Author = {Blum, W.},
	Booktitle = {Plastic {D}eformation and {F}racture of {M}aterials},
	Date-Added = {2019-09-05 11:51:28 +0200},
	Date-Modified = {2019-09-05 11:51:28 +0200},
	Editor = {Mughrabi, H.},
	Pages = {359-405},
	Publisher = {VCH Verlagsgesellschaft},
	Series = {Materials Science and Technology, ed. by R. W. Cahn, P. Haasen and E. J. Kramer},
	Title = {High-{T}emperature {D}eformation and {C}reep of {C}rystalline {S}olids},
	Volume = {6},
	Year = {1993},
	Bdsk-File-1 = {YnBsaXN0MDDSAQIDBFxyZWxhdGl2ZVBhdGhZYWxpYXNEYXRhXxBPLi4vLi4vLi4vLi4vLi4vLi4vLi4vLi4vcGFwZXJzL0JsdTkzYkhpZ2gtVGVtcGVyYXR1cmUgRGVmb3JtYXRpb24gYW5kIENyZWVwLnBkZk8RAdoAAAAAAdoAAgAADE1hY2ludG9zaCBIRAAAAAAAAAAAAAAAAAAAAAAAAABCRAAB/////x9CbHU5M2JIaWdoLVRlbXBlcmEjRkZGRkZGRkYucGRmAAAAAAAAAAAAAAAAAAAAAAAAAAAAAAAAAAAAAAAAAAD/////AAAAAFBERiBDQVJPAAgAAgAACiBjdQAAAAAAAAAAAAAAAAAGcGFwZXJzAAIATy86VXNlcnM6d2JsdW06RG9jdW1lbnRzOnBhcGVyczpCbHU5M2JIaWdoLVRlbXBlcmF0dXJlIERlZm9ybWF0aW9uIGFuZCBDcmVlcC5wZGYAAA4AYgAwAEIAbAB1ADkAMwBiAEgAaQBnAGgALQBUAGUAbQBwAGUAcgBhAHQAdQByAGUAIABEAGUAZgBvAHIAbQBhAHQAaQBvAG4AIABhAG4AZAAgAEMAcgBlAGUAcAAuAHAAZABmAA8AGgAMAE0AYQBjAGkAbgB0AG8AcwBoACAASABEABIATVVzZXJzL3dibHVtL0RvY3VtZW50cy9wYXBlcnMvQmx1OTNiSGlnaC1UZW1wZXJhdHVyZSBEZWZvcm1hdGlvbiBhbmQgQ3JlZXAucGRmAAATAAEvAAAVAAIADP//AAAACAANABoAJAB2AAAAAAAAAgEAAAAAAAAABQAAAAAAAAAAAAAAAAAAAlQ=},
	Bdsk-File-2 = {YnBsaXN0MDDSAQIDBFxyZWxhdGl2ZVBhdGhZYWxpYXNEYXRhXxBQLi4vLi4vLi4vLi4vLi4vLi4vLi4vLi4vcGFwZXJzL0JsdTkzYUhpZ2gtVGVtcGVyYXR1cmUgRGVmb3JtYXRpb24gYW5kIENyZWVwLi5wZGZPEQHcAAAAAAHcAAIAAAxNYWNpbnRvc2ggSEQAAAAAAAAAAAAAAAAAAAAAAAAAQkQAAf////8fQmx1OTNhSGlnaC1UZW1wZXJhI0ZGRkZGRkZGLnBkZgAAAAAAAAAAAAAAAAAAAAAAAAAAAAAAAAAAAAAAAAAA/////wAAAABQREYgQ0FSTwAIAAIAAAogY3UAAAAAAAAAAAAAAAAABnBhcGVycwACAFAvOlVzZXJzOndibHVtOkRvY3VtZW50czpwYXBlcnM6Qmx1OTNhSGlnaC1UZW1wZXJhdHVyZSBEZWZvcm1hdGlvbiBhbmQgQ3JlZXAuLnBkZgAOAGQAMQBCAGwAdQA5ADMAYQBIAGkAZwBoAC0AVABlAG0AcABlAHIAYQB0AHUAcgBlACAARABlAGYAbwByAG0AYQB0AGkAbwBuACAAYQBuAGQAIABDAHIAZQBlAHAALgAuAHAAZABmAA8AGgAMAE0AYQBjAGkAbgB0AG8AcwBoACAASABEABIATlVzZXJzL3dibHVtL0RvY3VtZW50cy9wYXBlcnMvQmx1OTNhSGlnaC1UZW1wZXJhdHVyZSBEZWZvcm1hdGlvbiBhbmQgQ3JlZXAuLnBkZgATAAEvAAAVAAIADP//AAAACAANABoAJAB3AAAAAAAAAgEAAAAAAAAABQAAAAAAAAAAAAAAAAAAAlc=},
	Bdsk-File-3 = {YnBsaXN0MDDSAQIDBFxyZWxhdGl2ZVBhdGhZYWxpYXNEYXRhXxBPLi4vLi4vLi4vLi4vLi4vLi4vLi4vLi4vcGFwZXJzL0JsdTkzSGlnaC1UZW1wZXJhdHVyZSBEZWZvcm1hdGlvbiBhbmQgQ3JlZXAuLnBkZk8RAdoAAAAAAdoAAgAADE1hY2ludG9zaCBIRAAAAAAAAAAAAAAAAAAAAAAAAABCRAAB/////x9CbHU5M0hpZ2gtVGVtcGVyYXQjRkZGRkZGRkYucGRmAAAAAAAAAAAAAAAAAAAAAAAAAAAAAAAAAAAAAAAAAAD/////AAAAAAAAAAAAAAAAAAgAAgAACiBjdQAAAAAAAAAAAAAAAAAGcGFwZXJzAAIATy86VXNlcnM6d2JsdW06RG9jdW1lbnRzOnBhcGVyczpCbHU5M0hpZ2gtVGVtcGVyYXR1cmUgRGVmb3JtYXRpb24gYW5kIENyZWVwLi5wZGYAAA4AYgAwAEIAbAB1ADkAMwBIAGkAZwBoAC0AVABlAG0AcABlAHIAYQB0AHUAcgBlACAARABlAGYAbwByAG0AYQB0AGkAbwBuACAAYQBuAGQAIABDAHIAZQBlAHAALgAuAHAAZABmAA8AGgAMAE0AYQBjAGkAbgB0AG8AcwBoACAASABEABIATVVzZXJzL3dibHVtL0RvY3VtZW50cy9wYXBlcnMvQmx1OTNIaWdoLVRlbXBlcmF0dXJlIERlZm9ybWF0aW9uIGFuZCBDcmVlcC4ucGRmAAATAAEvAAAVAAIADP//AAAACAANABoAJAB2AAAAAAAAAgEAAAAAAAAABQAAAAAAAAAAAAAAAAAAAlQ=}}

@article{WonWenLan13Microstructural-evolution-in-a-CuZr,
	Author = {Jittraporn Wongsa-Ngam and Haiming Wen and Terence G. Langdon},
	Date-Added = {2019-09-05 11:50:57 +0200},
	Date-Modified = {2019-09-05 11:50:57 +0200},
	Journal = {Mater. Sci. Eng. A},
	Pages = {126--135},
	Title = {Microstructural evolution in a {C}u--{Z}r alloy processed by a combination of {ECAP} and {HPT}},
	Volume = {579},
	Year = {2013},
	Bdsk-File-1 = {YnBsaXN0MDDSAQIDBFxyZWxhdGl2ZVBhdGhZYWxpYXNEYXRhbxBTAC4ALgAvAC4ALgAvAC4ALgAvAC4ALgAvAC4ALgAvAC4ALgAvAC4ALgAvAC4ALgAvAHAAYQBwAGUAcgBzAC8AVwBvAG4AVwBlAG4ATABhAG4AMQAzAE0AaQBjAHIAbwBzAHQAcgB1AGMAdAB1AHIAYQBsACAAZQB2AG8AbAB1AHQAaQBvAG4AIABpAG4AIABhACAAQwB1IBMAWgByAC4ALgBwAGQAZk8RAe4AAAAAAe4AAgAADE1hY2ludG9zaCBIRAAAAAAAAAAAAAAAAAAAAAAAAABCRAAB/////x9Xb25XZW5MYW4xM01pY3Jvc3QjRkZGRkZGRkYucGRmAAAAAAAAAAAAAAAAAAAAAAAAAAAAAAAAAAAAAAAAAAD/////AAAAAAAAAAAAAAAAAAgAAgAACiBjdQAAAAAAAAAAAAAAAAAGcGFwZXJzAAIAVS86VXNlcnM6d2JsdW06RG9jdW1lbnRzOnBhcGVyczpXb25XZW5MYW4xM01pY3Jvc3RydWN0dXJhbCBldm9sdXRpb24gaW4gYSBDdeKAk1pyLi5wZGYAAA4AagA0AFcAbwBuAFcAZQBuAEwAYQBuADEAMwBNAGkAYwByAG8AcwB0AHIAdQBjAHQAdQByAGEAbAAgAGUAdgBvAGwAdQB0AGkAbwBuACAAaQBuACAAYQAgAEMAdSATAFoAcgAuAC4AcABkAGYADwAaAAwATQBhAGMAaQBuAHQAbwBzAGgAIABIAEQAEgBTVXNlcnMvd2JsdW0vRG9jdW1lbnRzL3BhcGVycy9Xb25XZW5MYW4xM01pY3Jvc3RydWN0dXJhbCBldm9sdXRpb24gaW4gYSBDdeKAk1pyLi5wZGYAABMAAS8AABUAAgAM//8AAAAIAA0AGgAkAM0AAAAAAAACAQAAAAAAAAAFAAAAAAAAAAAAAAAAAAACvw==}}

@article{AmoDivEst07Short-circuit-diffusion-in-an-ultrafine-grained,
	Author = {Y. Amouyal and S.V. Divinski and Y. Estrin and E. Rabkin},
	Date-Added = {2019-09-05 11:50:14 +0200},
	Date-Modified = {2019-09-05 11:50:14 +0200},
	Journal = {Acta Materialia},
	Keywords = {Cu-Zr UFG ECAP grain boundary diffusion},
	Pages = {5968--5979},
	Title = {Short-circuit diffusion in an ultrafine-grained copper--zirconium alloy produced by equal channel angular pressing},
	Volume = {55},
	Year = {2007},
	Bdsk-File-1 = {YnBsaXN0MDDSAQIDBFxyZWxhdGl2ZVBhdGhZYWxpYXNEYXRhXxBeLi4vLi4vLi4vLi4vLi4vLi4vLi4vLi4vcGFwZXJzL0Ftb0RpdkVzdDA3U2hvcnQtY2lyY3VpdCBkaWZmdXNpb24gaW4gYW4gdWx0cmFmaW5lLWdyYWluZWQuLnBkZk8RAhQAAAAAAhQAAgAADE1hY2ludG9zaCBIRAAAAAAAAAAAAAAAAAAAAAAAAABCRAAB/////x9BbW9EaXZFc3QwN1Nob3J0LWMjRkZGRkZGRkYucGRmAAAAAAAAAAAAAAAAAAAAAAAAAAAAAAAAAAAAAAAAAAD/////AAAAAAAAAAAAAAAAAAgAAgAACiBjdQAAAAAAAAAAAAAAAAAGcGFwZXJzAAIAXi86VXNlcnM6d2JsdW06RG9jdW1lbnRzOnBhcGVyczpBbW9EaXZFc3QwN1Nob3J0LWNpcmN1aXQgZGlmZnVzaW9uIGluIGFuIHVsdHJhZmluZS1ncmFpbmVkLi5wZGYADgCAAD8AQQBtAG8ARABpAHYARQBzAHQAMAA3AFMAaABvAHIAdAAtAGMAaQByAGMAdQBpAHQAIABkAGkAZgBmAHUAcwBpAG8AbgAgAGkAbgAgAGEAbgAgAHUAbAB0AHIAYQBmAGkAbgBlAC0AZwByAGEAaQBuAGUAZAAuAC4AcABkAGYADwAaAAwATQBhAGMAaQBuAHQAbwBzAGgAIABIAEQAEgBcVXNlcnMvd2JsdW0vRG9jdW1lbnRzL3BhcGVycy9BbW9EaXZFc3QwN1Nob3J0LWNpcmN1aXQgZGlmZnVzaW9uIGluIGFuIHVsdHJhZmluZS1ncmFpbmVkLi5wZGYAEwABLwAAFQACAAz//wAAAAgADQAaACQAhQAAAAAAAAIBAAAAAAAAAAUAAAAAAAAAAAAAAAAAAAKd}}

@article{LiZenBlu04,
	Abstract = {The deformation behaviors of ultrafine-grained (UFG) pure Cu with 350 nm
		grain size produced by severe plastic deformation and of coarse-grained
		(CG) Cu were investigated as function of temperature T and strain rate
		_. Below 450 K (0.33 of melting temperature) the grain structure is fairly
		stable. Here the grain boundaries in UFG Cu have a strengthening effect
		with regard to plastic yielding. With increasing strain , increasing T
		and decreasing _, however, the strengthening turns into softening by grain
		boundaries. This transition is related with distinctly higher strain rate
		sensitivity of UFG Cu compared to CG Cu and a relatively low activation
		energy of flow in the order of 100 kJ/mol. At steady state, the range of
		softening by grain boundaries extends from the stability limit of the grain
		structure of UFG Cu down to a temperature close to room temperature where
		UFG Cu was produced. The transition from strengthening to softening is
		explained in terms of generation and grain boundary diffusion controlled
		annihilation of lattice dislocations at grain boundaries.},
	Annote = {220,LiZenBlu04},
	Author = {Li, Y.J. and Zeng, X.H. and Blum, W.},
	Date-Added = {2019-09-05 11:49:38 +0200},
	Date-Modified = {2019-09-05 11:49:38 +0200},
	Doi = {10.1016/j.actamat.2004.07.003},
	Journal = {Acta Mater.},
	Local-Url = {file://localhost/Users/wblum/Documents/papers/LiZenBlu04},
	Number = {17},
	Pages = {5009-5018},
	Title = {Transition from strengthening to softening by grain boundaries in ultrafine-grained {C}u},
	Volume = {52},
	Year = {2004},
	Bdsk-File-1 = {YnBsaXN0MDDSAQIDBFxyZWxhdGl2ZVBhdGhZYWxpYXNEYXRhXxAtLi4vLi4vLi4vLi4vLi4vLi4vLi4vLi4vcGFwZXJzL0xpWmVuQmx1MDQucGRmTxEBUgAAAAABUgACAAAMTWFjaW50b3NoIEhEAAAAAAAAAAAAAAAAAAAAAAAAAEJEAAH/////DkxpWmVuQmx1MDQucGRmAAAAAAAAAAAAAAAAAAAAAAAAAAAAAAAAAAAAAAAAAAAAAAAAAAAAAAAAAAAAAAAAAP////8AAAAAAAAAAAAAAAAACAACAAAKIGN1AAAAAAAAAAAAAAAAAAZwYXBlcnMAAgAtLzpVc2Vyczp3Ymx1bTpEb2N1bWVudHM6cGFwZXJzOkxpWmVuQmx1MDQucGRmAAAOAB4ADgBMAGkAWgBlAG4AQgBsAHUAMAA0AC4AcABkAGYADwAaAAwATQBhAGMAaQBuAHQAbwBzAGgAIABIAEQAEgArVXNlcnMvd2JsdW0vRG9jdW1lbnRzL3BhcGVycy9MaVplbkJsdTA0LnBkZgAAEwABLwAAFQACAAz//wAAAAgADQAaACQAVAAAAAAAAAIBAAAAAAAAAAUAAAAAAAAAAAAAAAAAAAGq},
	Bdsk-File-2 = {YnBsaXN0MDDSAQIDBFxyZWxhdGl2ZVBhdGhZYWxpYXNEYXRhXxAqLi4vLi4vLi4vLi4vLi4vLi4vLi4vLi4vcGFwZXJzL0xpWmVuQmx1MDRhTxEBRAAAAAABRAACAAAMTWFjaW50b3NoIEhEAAAAAAAAAAAAAAAAAAAAAAAAAEJEAAH/////C0xpWmVuQmx1MDRhAAAAAAAAAAAAAAAAAAAAAAAAAAAAAAAAAAAAAAAAAAAAAAAAAAAAAAAAAAAAAAAAAAAAAP////8AAAAAUERGIENBUk8ACAACAAAKIGN1AAAAAAAAAAAAAAAAAAZwYXBlcnMAAgAqLzpVc2Vyczp3Ymx1bTpEb2N1bWVudHM6cGFwZXJzOkxpWmVuQmx1MDRhAA4AGAALAEwAaQBaAGUAbgBCAGwAdQAwADQAYQAPABoADABNAGEAYwBpAG4AdABvAHMAaAAgAEgARAASAChVc2Vycy93Ymx1bS9Eb2N1bWVudHMvcGFwZXJzL0xpWmVuQmx1MDRhABMAAS8AABUAAgAM//8AAAAIAA0AGgAkAFEAAAAAAAACAQAAAAAAAAAFAAAAAAAAAAAAAAAAAAABmQ==},
	Bdsk-File-3 = {YnBsaXN0MDDSAQIDBFxyZWxhdGl2ZVBhdGhZYWxpYXNEYXRhXxAqLi4vLi4vLi4vLi4vLi4vLi4vLi4vLi4vcGFwZXJzL0xpWmVuQmx1MDRiTxEBRAAAAAABRAACAAAMTWFjaW50b3NoIEhEAAAAAAAAAAAAAAAAAAAAAAAAAEJEAAH/////C0xpWmVuQmx1MDRiAAAAAAAAAAAAAAAAAAAAAAAAAAAAAAAAAAAAAAAAAAAAAAAAAAAAAAAAAAAAAAAAAAAAAP////8AAAAAAAAAAAAAAAAACAACAAAKIGN1AAAAAAAAAAAAAAAAAAZwYXBlcnMAAgAqLzpVc2Vyczp3Ymx1bTpEb2N1bWVudHM6cGFwZXJzOkxpWmVuQmx1MDRiAA4AGAALAEwAaQBaAGUAbgBCAGwAdQAwADQAYgAPABoADABNAGEAYwBpAG4AdABvAHMAaAAgAEgARAASAChVc2Vycy93Ymx1bS9Eb2N1bWVudHMvcGFwZXJzL0xpWmVuQmx1MDRiABMAAS8AABUAAgAM//8AAAAIAA0AGgAkAFEAAAAAAAACAQAAAAAAAAAFAAAAAAAAAAAAAAAAAAABmQ==},
	Bdsk-Url-1 = {http://dx.doi.org/10.1016/j.actamat.2004.07.003}}

@article{NeiHorLan03Achieving-superplasticity-in-ultrafine-grained,
	Author = {Koji Neishi and Zenji Horita and Terence G. Langdon},
	Date-Added = {2019-09-05 11:49:07 +0200},
	Date-Modified = {2019-09-05 11:49:07 +0200},
	Journal = {Materials Science and Engineering A},
	Keywords = {Cu Zn Zr UFG superplasticity},
	Pages = {129􏰀--135},
	Title = {Achieving superplasticity in ultrafine-grained copper: influence of {Z}n and {Z}r additions},
	Volume = {352},
	Year = {2003},
	Bdsk-File-1 = {YnBsaXN0MDDSAQIDBFxyZWxhdGl2ZVBhdGhZYWxpYXNEYXRhXxBdLi4vLi4vLi4vLi4vLi4vLi4vLi4vLi4vcGFwZXJzL05laUhvckxhbjAzQWNoaWV2aW5nIHN1cGVycGxhc3RpY2l0eSBpbiB1bHRyYWZpbmUtZ3JhaW5lZC4ucGRmTxECEgAAAAACEgACAAAMTWFjaW50b3NoIEhEAAAAAAAAAAAAAAAAAAAAAAAAAEJEAAH/////H05laUhvckxhbjAzQWNoaWV2aSNGRkZGRkZGRi5wZGYAAAAAAAAAAAAAAAAAAAAAAAAAAAAAAAAAAAAAAAAAAP////8AAAAAAAAAAAAAAAAACAACAAAKIGN1AAAAAAAAAAAAAAAAAAZwYXBlcnMAAgBdLzpVc2Vyczp3Ymx1bTpEb2N1bWVudHM6cGFwZXJzOk5laUhvckxhbjAzQWNoaWV2aW5nIHN1cGVycGxhc3RpY2l0eSBpbiB1bHRyYWZpbmUtZ3JhaW5lZC4ucGRmAAAOAH4APgBOAGUAaQBIAG8AcgBMAGEAbgAwADMAQQBjAGgAaQBlAHYAaQBuAGcAIABzAHUAcABlAHIAcABsAGEAcwB0AGkAYwBpAHQAeQAgAGkAbgAgAHUAbAB0AHIAYQBmAGkAbgBlAC0AZwByAGEAaQBuAGUAZAAuAC4AcABkAGYADwAaAAwATQBhAGMAaQBuAHQAbwBzAGgAIABIAEQAEgBbVXNlcnMvd2JsdW0vRG9jdW1lbnRzL3BhcGVycy9OZWlIb3JMYW4wM0FjaGlldmluZyBzdXBlcnBsYXN0aWNpdHkgaW4gdWx0cmFmaW5lLWdyYWluZWQuLnBkZgAAEwABLwAAFQACAAz//wAAAAgADQAaACQAhAAAAAAAAAIBAAAAAAAAAAUAAAAAAAAAAAAAAAAAAAKa}}

@article{SklDvoKra12Factors-influencing-creep,
	Author = {Skleni\v{c}ka, V. and J. Dvo\v{r}\'ak and P. Kr\'al and Svoboda, M. and Kvapilova, M. and Langdon, T.G.},
	Date-Added = {2019-09-05 11:48:28 +0200},
	Date-Modified = {2019-09-05 11:48:28 +0200},
	Journal = {Mater. Sci. Eng. A},
	Pages = {403-411},
	Title = {Factors influencing creep flow and ductility in ultrafine -- grained metals},
	Volume = {558},
	Year = {2012},
	Bdsk-File-1 = {YnBsaXN0MDDSAQIDBFxyZWxhdGl2ZVBhdGhZYWxpYXNEYXRhXxBILi4vLi4vLi4vLi4vLi4vLi4vLi4vLi4vcGFwZXJzL1NrbER2b0tyYTEyRmFjdG9ycyBpbmZsdWVuY2luZyBjcmVlcC4ucGRmTxEBvAAAAAABvAACAAAMTWFjaW50b3NoIEhEAAAAAAAAAAAAAAAAAAAAAAAAAEJEAAH/////H1NrbER2b0tyYTEyRmFjdG9ycyNGRkZGRkZGRi5wZGYAAAAAAAAAAAAAAAAAAAAAAAAAAAAAAAAAAAAAAAAAAP////8AAAAAAAAAAAAAAAAACAACAAAKIGN1AAAAAAAAAAAAAAAAAAZwYXBlcnMAAgBILzpVc2Vyczp3Ymx1bTpEb2N1bWVudHM6cGFwZXJzOlNrbER2b0tyYTEyRmFjdG9ycyBpbmZsdWVuY2luZyBjcmVlcC4ucGRmAA4AVAApAFMAawBsAEQAdgBvAEsAcgBhADEAMgBGAGEAYwB0AG8AcgBzACAAaQBuAGYAbAB1AGUAbgBjAGkAbgBnACAAYwByAGUAZQBwAC4ALgBwAGQAZgAPABoADABNAGEAYwBpAG4AdABvAHMAaAAgAEgARAASAEZVc2Vycy93Ymx1bS9Eb2N1bWVudHMvcGFwZXJzL1NrbER2b0tyYTEyRmFjdG9ycyBpbmZsdWVuY2luZyBjcmVlcC4ucGRmABMAAS8AABUAAgAM//8AAAAIAA0AGgAkAG8AAAAAAAACAQAAAAAAAAAFAAAAAAAAAAAAAAAAAAACLw==}}

@article{DvoKraKva11Microstructure-stability-and-creep,
	Annote = {Dvorak J, Kral P, Kvapilova M, Svoboda M, Sklenicka V (2011) Microstructure stability and creep behaviour of Cu-0.2wt.%Zr alloy processed by equal-channel angular pressing. Mat. Sci. Forum 667-669: 821-826. doi: 10.4028/www.scientific.net/MSF.667-669.821 },
	Author = {Dvorak, J. and Kral, P. and Kvapilova, M. and Svoboda, M. and Sklenicka, V.},
	Date-Added = {2019-09-05 11:47:47 +0200},
	Date-Modified = {2019-09-05 11:47:47 +0200},
	Doi = {10.4028/www.scientific.net/MSF.667-669.821},
	Journal = {Mat. Sci. Forum},
	Keywords = {Cu-Zr},
	Pages = {821-826},
	Title = {Microstructure stability and creep behaviour of {C}u-0.2wt.\%{Z}r alloy processed by equal-channel angular pressing},
	Volume = {667-669},
	Year = {2011},
	Bdsk-File-1 = {YnBsaXN0MDDSAQIDBFxyZWxhdGl2ZVBhdGhZYWxpYXNEYXRhXxBRLi4vLi4vLi4vLi4vLi4vLi4vLi4vLi4vcGFwZXJzL0R2b0tyYUt2YTExTWljcm9zdHJ1Y3R1cmUgc3RhYmlsaXR5IGFuZCBjcmVlcC4ucGRmTxEB4gAAAAAB4gACAAAMTWFjaW50b3NoIEhEAAAAAAAAAAAAAAAAAAAAAAAAAEJEAAH/////H0R2b0tyYUt2YTExTWljcm9zdCNGRkZGRkZGRi5wZGYAAAAAAAAAAAAAAAAAAAAAAAAAAAAAAAAAAAAAAAAAAP////8AAAAAAAAAAAAAAAAACAACAAAKIGN1AAAAAAAAAAAAAAAAAAZwYXBlcnMAAgBRLzpVc2Vyczp3Ymx1bTpEb2N1bWVudHM6cGFwZXJzOkR2b0tyYUt2YTExTWljcm9zdHJ1Y3R1cmUgc3RhYmlsaXR5IGFuZCBjcmVlcC4ucGRmAAAOAGYAMgBEAHYAbwBLAHIAYQBLAHYAYQAxADEATQBpAGMAcgBvAHMAdAByAHUAYwB0AHUAcgBlACAAcwB0AGEAYgBpAGwAaQB0AHkAIABhAG4AZAAgAGMAcgBlAGUAcAAuAC4AcABkAGYADwAaAAwATQBhAGMAaQBuAHQAbwBzAGgAIABIAEQAEgBPVXNlcnMvd2JsdW0vRG9jdW1lbnRzL3BhcGVycy9Edm9LcmFLdmExMU1pY3Jvc3RydWN0dXJlIHN0YWJpbGl0eSBhbmQgY3JlZXAuLnBkZgAAEwABLwAAFQACAAz//wAAAAgADQAaACQAeAAAAAAAAAIBAAAAAAAAAAUAAAAAAAAAAAAAAAAAAAJe},
	Bdsk-Url-1 = {http://dx.doi.org/10.4028/www.scientific.net/MSF.667-669.821}}

@article{KraSvoDvo11Microstructure-Mechanisms-Governing,
	Annote = {Sklenicka V, Dvorak J, Kral P, Svoboda S, Kvapilova M, Kopilov VI, Nikulin SA, Dobatkin SV (2012) Creep Behavior of a Zirconium Alloy Processed by Equal-Channel Angular Pressing. Acta Physica Polonica A 122:485-489},
	Author = {P. Kral and M. Svoboda and J. Dvorak and M. Kvapilova and V. Sklenicka},
	Date-Added = {2019-09-05 11:47:08 +0200},
	Date-Modified = {2019-09-05 11:47:08 +0200},
	Journal = {Acta Physica Polonica},
	Keywords = {Cu-Zr},
	Pages = {485-489},
	Title = {Microstructure Mechanisms Governing the Creep Life of Ultrafine-grained {C}u-0.2wt.\%{Z}r Alloy},
	Volume = {A 122},
	Year = {2012},
	Bdsk-File-1 = {YnBsaXN0MDDSAQIDBFxyZWxhdGl2ZVBhdGhZYWxpYXNEYXRhXxBSLi4vLi4vLi4vLi4vLi4vLi4vLi4vLi4vcGFwZXJzL0tyYVN2b0R2bzExTWljcm9zdHJ1Y3R1cmUgTWVjaGFuaXNtcyBHb3Zlcm5pbmcuLnBkZk8RAeQAAAAAAeQAAgAADE1hY2ludG9zaCBIRAAAAAAAAAAAAAAAAAAAAAAAAABCRAAB/////x9LcmFTdm9Edm8xMU1pY3Jvc3QjRkZGRkZGRkYucGRmAAAAAAAAAAAAAAAAAAAAAAAAAAAAAAAAAAAAAAAAAAD/////AAAAAAAAAAAAAAAAAAgAAgAACiBjdQAAAAAAAAAAAAAAAAAGcGFwZXJzAAIAUi86VXNlcnM6d2JsdW06RG9jdW1lbnRzOnBhcGVyczpLcmFTdm9Edm8xMU1pY3Jvc3RydWN0dXJlIE1lY2hhbmlzbXMgR292ZXJuaW5nLi5wZGYADgBoADMASwByAGEAUwB2AG8ARAB2AG8AMQAxAE0AaQBjAHIAbwBzAHQAcgB1AGMAdAB1AHIAZQAgAE0AZQBjAGgAYQBuAGkAcwBtAHMAIABHAG8AdgBlAHIAbgBpAG4AZwAuAC4AcABkAGYADwAaAAwATQBhAGMAaQBuAHQAbwBzAGgAIABIAEQAEgBQVXNlcnMvd2JsdW0vRG9jdW1lbnRzL3BhcGVycy9LcmFTdm9Edm8xMU1pY3Jvc3RydWN0dXJlIE1lY2hhbmlzbXMgR292ZXJuaW5nLi5wZGYAEwABLwAAFQACAAz//wAAAAgADQAaACQAeQAAAAAAAAIBAAAAAAAAAAUAAAAAAAAAAAAAAAAAAAJh}}

@article{EstVin13Extreme-grain-refinement,
	Author = {Y. Estrin and A. Vinogradov},
	Date-Added = {2019-09-05 11:46:25 +0200},
	Date-Modified = {2019-09-05 11:46:25 +0200},
	Doi = {10.1016/j.actamat.2012.10.038},
	Journal = {Acta Materialia},
	Pages = {782--817},
	Title = {Extreme grain refinement by severe plastic deformation: A wealth of challenging science},
	Volume = {61},
	Year = {2013},
	Bdsk-File-1 = {YnBsaXN0MDDSAQIDBFxyZWxhdGl2ZVBhdGhZYWxpYXNEYXRhXxBELi4vLi4vLi4vLi4vLi4vLi4vLi4vLi4vcGFwZXJzL0VzdFZpbjEzRXh0cmVtZSBncmFpbiByZWZpbmVtZW50Li5wZGZPEQGsAAAAAAGsAAIAAAxNYWNpbnRvc2ggSEQAAAAAAAAAAAAAAAAAAAAAAAAAQkQAAf////8fRXN0VmluMTNFeHRyZW1lIGdyI0ZGRkZGRkZGLnBkZgAAAAAAAAAAAAAAAAAAAAAAAAAAAAAAAAAAAAAAAAAA/////wAAAAAAAAAAAAAAAAAIAAIAAAogY3UAAAAAAAAAAAAAAAAABnBhcGVycwACAEQvOlVzZXJzOndibHVtOkRvY3VtZW50czpwYXBlcnM6RXN0VmluMTNFeHRyZW1lIGdyYWluIHJlZmluZW1lbnQuLnBkZgAOAEwAJQBFAHMAdABWAGkAbgAxADMARQB4AHQAcgBlAG0AZQAgAGcAcgBhAGkAbgAgAHIAZQBmAGkAbgBlAG0AZQBuAHQALgAuAHAAZABmAA8AGgAMAE0AYQBjAGkAbgB0AG8AcwBoACAASABEABIAQlVzZXJzL3dibHVtL0RvY3VtZW50cy9wYXBlcnMvRXN0VmluMTNFeHRyZW1lIGdyYWluIHJlZmluZW1lbnQuLnBkZgATAAEvAAAVAAIADP//AAAACAANABoAJABrAAAAAAAAAgEAAAAAAAAABQAAAAAAAAAAAAAAAAAAAhs=}}

@article{ValIslAle00,
	Author = {Valiev, R.Z. and Islamgaliev, R.K. and Alexandrov, I.V.},
	Citation-Origin = {Li},
	Date-Added = {2019-09-05 11:45:42 +0200},
	Date-Modified = {2019-09-05 11:45:42 +0200},
	Journal = {Progr. Mater. Sci.},
	Pages = {103-189},
	Title = {{B}ulk nanostructured materials from severe plastic deformation},
	Volume = {45},
	Year = {2000}}

@article{IwaHorNemLan98,
	Author = {Iwahashi, Y. and Horita, Z. and Nemoto, M. and Langdon, T.},
	Citation-Origin = {Li},
	Date-Added = {2019-09-05 11:44:57 +0200},
	Date-Modified = {2019-09-05 11:44:57 +0200},
	Journal = {Acta Mater.},
	Number = {9},
	Pages = {3317-3331},
	Title = {The process of grain refinement in equal-channel angular pressing},
	Volume = {46},
	Year = {1998},
	Bdsk-File-1 = {YnBsaXN0MDDSAQIDBFxyZWxhdGl2ZVBhdGhZYWxpYXNEYXRhXxBOLi4vLi4vLi4vLi4vLi4vLi4vLi4vLi4vcGFwZXJzL0l3YUhvck5lbTk4VGhlIHByb2Nlc3Mgb2YgZ3JhaW4gcmVmaW5lbWVudC4ucGRmTxEB1AAAAAAB1AACAAAMTWFjaW50b3NoIEhEAAAAAAAAAAAAAAAAAAAAAAAAAEJEAAH/////H0l3YUhvck5lbTk4VGhlIHBybyNGRkZGRkZGRi5wZGYAAAAAAAAAAAAAAAAAAAAAAAAAAAAAAAAAAAAAAAAAAP////8AAAAAAAAAAAAAAAAACAACAAAKIGN1AAAAAAAAAAAAAAAAAAZwYXBlcnMAAgBOLzpVc2Vyczp3Ymx1bTpEb2N1bWVudHM6cGFwZXJzOkl3YUhvck5lbTk4VGhlIHByb2Nlc3Mgb2YgZ3JhaW4gcmVmaW5lbWVudC4ucGRmAA4AYAAvAEkAdwBhAEgAbwByAE4AZQBtADkAOABUAGgAZQAgAHAAcgBvAGMAZQBzAHMAIABvAGYAIABnAHIAYQBpAG4AIAByAGUAZgBpAG4AZQBtAGUAbgB0AC4ALgBwAGQAZgAPABoADABNAGEAYwBpAG4AdABvAHMAaAAgAEgARAASAExVc2Vycy93Ymx1bS9Eb2N1bWVudHMvcGFwZXJzL0l3YUhvck5lbTk4VGhlIHByb2Nlc3Mgb2YgZ3JhaW4gcmVmaW5lbWVudC4ucGRmABMAAS8AABUAAgAM//8AAAAIAA0AGgAkAHUAAAAAAAACAQAAAAAAAAAFAAAAAAAAAAAAAAAAAAACTQ==}}

@article{VaKoMu93,
	Author = {Valiev, R. Z. and Korznikov, A. V. and Mulyukov, R. R.},
	Citation-Origin = {Blum},
	Date-Added = {2019-09-05 11:44:31 +0200},
	Date-Modified = {2019-09-05 11:44:31 +0200},
	Journal = {Mater. Sci. Eng. A},
	Pages = {141-148},
	Title = {Structure and properties of ultrafine-grained materials produced by severe plastic deformation},
	Volume = {168},
	Year = {1993}}

@incollection{BluEis11Structure-evolution-and-deformation,
	Address = {Switzerland},
	Author = {W. Blum and P. Eisenlohr},
	Booktitle = {Advanced mechanical properties and deformation mechanisms of bulk nanostructured materials},
	Date-Added = {2019-09-05 11:43:56 +0200},
	Date-Modified = {2019-09-05 11:43:56 +0200},
	Doi = {10.4028/www.scientific.net/MSF.683.163},
	Editor = {Yonghao Zhao},
	Issn = {0255-5476},
	Journal = {Mater. Sci. Forum},
	Local-Url = {/Users/wblum/Documents/Texte/Publikationen/papers_In_Arbeit/BluEis11},
	Pages = {163-181},
	Publisher = {Trans Tech Publications},
	Series = {Materials Science Forum},
	Title = {Structure evolution and deformation resistance in production and application of nanostructured materials -- the concept of steady-state grains},
	Volume = {683},
	Year = {2011},
	Bdsk-File-1 = {YnBsaXN0MDDSAQIDBFxyZWxhdGl2ZVBhdGhZYWxpYXNEYXRhXxBQLi4vLi4vLi4vLi4vLi4vLi4vLi4vLi4vcGFwZXJzL0JsdUVpczExYVN0cnVjdHVyZSBldm9sdXRpb24gYW5kIGRlZm9ybWF0aW9uLi5wZGZPEQHcAAAAAAHcAAIAAAxNYWNpbnRvc2ggSEQAAAAAAAAAAAAAAAAAAAAAAAAAQkQAAf////8fQmx1RWlzMTFhU3RydWN0dXJlI0ZGRkZGRkZGLnBkZgAAAAAAAAAAAAAAAAAAAAAAAAAAAAAAAAAAAAAAAAAA/////wAAAABQREYgQ0FSTwAIAAIAAAogY3UAAAAAAAAAAAAAAAAABnBhcGVycwACAFAvOlVzZXJzOndibHVtOkRvY3VtZW50czpwYXBlcnM6Qmx1RWlzMTFhU3RydWN0dXJlIGV2b2x1dGlvbiBhbmQgZGVmb3JtYXRpb24uLnBkZgAOAGQAMQBCAGwAdQBFAGkAcwAxADEAYQBTAHQAcgB1AGMAdAB1AHIAZQAgAGUAdgBvAGwAdQB0AGkAbwBuACAAYQBuAGQAIABkAGUAZgBvAHIAbQBhAHQAaQBvAG4ALgAuAHAAZABmAA8AGgAMAE0AYQBjAGkAbgB0AG8AcwBoACAASABEABIATlVzZXJzL3dibHVtL0RvY3VtZW50cy9wYXBlcnMvQmx1RWlzMTFhU3RydWN0dXJlIGV2b2x1dGlvbiBhbmQgZGVmb3JtYXRpb24uLnBkZgATAAEvAAAVAAIADP//AAAACAANABoAJAB3AAAAAAAAAgEAAAAAAAAABQAAAAAAAAAAAAAAAAAAAlc=},
	Bdsk-File-2 = {YnBsaXN0MDDSAQIDBFxyZWxhdGl2ZVBhdGhZYWxpYXNEYXRhXxBPLi4vLi4vLi4vLi4vLi4vLi4vLi4vLi4vcGFwZXJzL0JsdUVpczExU3RydWN0dXJlIGV2b2x1dGlvbiBhbmQgZGVmb3JtYXRpb24uLnBkZk8RAdoAAAAAAdoAAgAADE1hY2ludG9zaCBIRAAAAAAAAAAAAAAAAAAAAAAAAABCRAAB/////x9CbHVFaXMxMVN0cnVjdHVyZSAjRkZGRkZGRkYucGRmAAAAAAAAAAAAAAAAAAAAAAAAAAAAAAAAAAAAAAAAAAD/////AAAAAAAAAAAAAAAAAAgAAgAACiBjdQAAAAAAAAAAAAAAAAAGcGFwZXJzAAIATy86VXNlcnM6d2JsdW06RG9jdW1lbnRzOnBhcGVyczpCbHVFaXMxMVN0cnVjdHVyZSBldm9sdXRpb24gYW5kIGRlZm9ybWF0aW9uLi5wZGYAAA4AYgAwAEIAbAB1AEUAaQBzADEAMQBTAHQAcgB1AGMAdAB1AHIAZQAgAGUAdgBvAGwAdQB0AGkAbwBuACAAYQBuAGQAIABkAGUAZgBvAHIAbQBhAHQAaQBvAG4ALgAuAHAAZABmAA8AGgAMAE0AYQBjAGkAbgB0AG8AcwBoACAASABEABIATVVzZXJzL3dibHVtL0RvY3VtZW50cy9wYXBlcnMvQmx1RWlzMTFTdHJ1Y3R1cmUgZXZvbHV0aW9uIGFuZCBkZWZvcm1hdGlvbi4ucGRmAAATAAEvAAAVAAIADP//AAAACAANABoAJAB2AAAAAAAAAgEAAAAAAAAABQAAAAAAAAAAAAAAAAAAAlQ=},
	Bdsk-File-3 = {YnBsaXN0MDDSAQIDBFxyZWxhdGl2ZVBhdGhZYWxpYXNEYXRhXxBSLi4vLi4vLi4vLi4vLi4vLi4vLi4vLi4vcGFwZXJzL0JsdUVpczExRXZvbHV0aW9uIG9mIHN0cnVjdHVyZSBhbmQgZGVmb3JtYXRpb24uLnBkZk8RAeQAAAAAAeQAAgAADE1hY2ludG9zaCBIRAAAAAAAAAAAAAAAAAAAAAAAAABCRAAB/////x9CbHVFaXMxMUV2b2x1dGlvbiAjRkZGRkZGRkYucGRmAAAAAAAAAAAAAAAAAAAAAAAAAAAAAAAAAAAAAAAAAAD/////AAAAAAAAAAAAAAAAAAgAAgAACiBjdQAAAAAAAAAAAAAAAAAGcGFwZXJzAAIAUi86VXNlcnM6d2JsdW06RG9jdW1lbnRzOnBhcGVyczpCbHVFaXMxMUV2b2x1dGlvbiBvZiBzdHJ1Y3R1cmUgYW5kIGRlZm9ybWF0aW9uLi5wZGYADgBoADMAQgBsAHUARQBpAHMAMQAxAEUAdgBvAGwAdQB0AGkAbwBuACAAbwBmACAAcwB0AHIAdQBjAHQAdQByAGUAIABhAG4AZAAgAGQAZQBmAG8AcgBtAGEAdABpAG8AbgAuAC4AcABkAGYADwAaAAwATQBhAGMAaQBuAHQAbwBzAGgAIABIAEQAEgBQVXNlcnMvd2JsdW0vRG9jdW1lbnRzL3BhcGVycy9CbHVFaXMxMUV2b2x1dGlvbiBvZiBzdHJ1Y3R1cmUgYW5kIGRlZm9ybWF0aW9uLi5wZGYAEwABLwAAFQACAAz//wAAAAgADQAaACQAeQAAAAAAAAIBAAAAAAAAAAUAAAAAAAAAAAAAAAAAAAJh}}

@article{Mug05,
	Author = {Mughrabi, H.},
	Date-Added = {2019-09-05 11:43:18 +0200},
	Date-Modified = {2019-09-05 11:43:18 +0200},
	Journal = {Z. Metallkd.},
	Pages = {546-551},
	Title = {Implications of non-negligible microstructural variations during steady state deformation},
	Volume = {96},
	Year = {2005}}

@article{BluDvoKra14Stationary-deformation-of-pure,
	Annote = {10.1002/1521-396X(200103)184:1<257::AID-PSSA257>3.0.CO;2-I},
	Author = {W. Blum and J. Dvo\v{r}\'ak and P. Kr\'al and P. Eisenlohr and V. Skleni\v{c}ka},
	Date-Added = {2019-09-05 11:42:09 +0200},
	Date-Modified = {2019-09-05 11:42:09 +0200},
	Doi = {10.1007/s10853-013-7983-4},
	Journal = {J. Mater. Sci.},
	Keywords = {CG Cu, stationary, quasi-stationary},
	Month = {April},
	Number = {8},
	Pages = {2987-2997},
	Title = {What is stationary deformation of pure {C}u?},
	Volume = {49},
	Year = {2014},
	Bdsk-File-1 = {YnBsaXN0MDDSAQIDBFxyZWxhdGl2ZVBhdGhZYWxpYXNEYXRhXxBLLi4vLi4vLi4vLi4vLi4vLi4vLi4vLi4vcGFwZXJzL0JsdUR2b0tyMTRXaGF0IGlzIHN0YXRpb25hcnkgZGVmb3JtYXRpb24ucGRmTxEBygAAAAABygACAAAMTWFjaW50b3NoIEhEAAAAAAAAAAAAAAAAAAAAAAAAAEJEAAH/////H0JsdUR2b0tyMTRXaGF0IGlzICNGRkZGRkZGRi5wZGYAAAAAAAAAAAAAAAAAAAAAAAAAAAAAAAAAAAAAAAAAAP////8AAAAAAAAAAAAAAAAACAACAAAKIGN1AAAAAAAAAAAAAAAAAAZwYXBlcnMAAgBLLzpVc2Vyczp3Ymx1bTpEb2N1bWVudHM6cGFwZXJzOkJsdUR2b0tyMTRXaGF0IGlzIHN0YXRpb25hcnkgZGVmb3JtYXRpb24ucGRmAAAOAFoALABCAGwAdQBEAHYAbwBLAHIAMQA0AFcAaABhAHQAIABpAHMAIABzAHQAYQB0AGkAbwBuAGEAcgB5ACAAZABlAGYAbwByAG0AYQB0AGkAbwBuAC4AcABkAGYADwAaAAwATQBhAGMAaQBuAHQAbwBzAGgAIABIAEQAEgBJVXNlcnMvd2JsdW0vRG9jdW1lbnRzL3BhcGVycy9CbHVEdm9LcjE0V2hhdCBpcyBzdGF0aW9uYXJ5IGRlZm9ybWF0aW9uLnBkZgAAEwABLwAAFQACAAz//wAAAAgADQAaACQAcgAAAAAAAAIBAAAAAAAAAAUAAAAAAAAAAAAAAAAAAAJA},
	Bdsk-File-2 = {YnBsaXN0MDDSAQIDBFxyZWxhdGl2ZVBhdGhZYWxpYXNEYXRhXxBNLi4vLi4vLi4vLi4vLi4vLi4vLi4vLi4vcGFwZXJzL0JsdUR2b0tyMTNXaGF0IGlzIHN0YXRpb25hcnkgZGVmb3JtYXRpb24tYS5wZGZPEQHSAAAAAAHSAAIAAAxNYWNpbnRvc2ggSEQAAAAAAAAAAAAAAAAAAAAAAAAAQkQAAf////8fQmx1RHZvS3IxM1doYXQgaXMgI0ZGRkZGRkZGLnBkZgAAAAAAAAAAAAAAAAAAAAAAAAAAAAAAAAAAAAAAAAAA/////wAAAAAAAAAAAAAAAAAIAAIAAAogY3UAAAAAAAAAAAAAAAAABnBhcGVycwACAE0vOlVzZXJzOndibHVtOkRvY3VtZW50czpwYXBlcnM6Qmx1RHZvS3IxM1doYXQgaXMgc3RhdGlvbmFyeSBkZWZvcm1hdGlvbi1hLnBkZgAADgBeAC4AQgBsAHUARAB2AG8ASwByADEAMwBXAGgAYQB0ACAAaQBzACAAcwB0AGEAdABpAG8AbgBhAHIAeQAgAGQAZQBmAG8AcgBtAGEAdABpAG8AbgAtAGEALgBwAGQAZgAPABoADABNAGEAYwBpAG4AdABvAHMAaAAgAEgARAASAEtVc2Vycy93Ymx1bS9Eb2N1bWVudHMvcGFwZXJzL0JsdUR2b0tyMTNXaGF0IGlzIHN0YXRpb25hcnkgZGVmb3JtYXRpb24tYS5wZGYAABMAAS8AABUAAgAM//8AAAAIAA0AGgAkAHQAAAAAAAACAQAAAAAAAAAFAAAAAAAAAAAAAAAAAAACSg==},
	Bdsk-File-3 = {YnBsaXN0MDDSAQIDBFxyZWxhdGl2ZVBhdGhZYWxpYXNEYXRhXxBOLi4vLi4vLi4vLi4vLi4vLi4vLi4vLi4vcGFwZXJzL0JsdUR2b0tyYTE0YldoYXQgaXMgc3RhdGlvbmFyeSBkZWZvcm1hdGlvbi4ucGRmTxEB1AAAAAAB1AACAAAMTWFjaW50b3NoIEhEAAAAAAAAAAAAAAAAAAAAAAAAAEJEAAH/////H0JsdUR2b0tyYTE0YldoYXQgaSNGRkZGRkZGRi5wZGYAAAAAAAAAAAAAAAAAAAAAAAAAAAAAAAAAAAAAAAAAAP////8AAAAAAAAAAAAAAAAACAACAAAKIGN1AAAAAAAAAAAAAAAAAAZwYXBlcnMAAgBOLzpVc2Vyczp3Ymx1bTpEb2N1bWVudHM6cGFwZXJzOkJsdUR2b0tyYTE0YldoYXQgaXMgc3RhdGlvbmFyeSBkZWZvcm1hdGlvbi4ucGRmAA4AYAAvAEIAbAB1AEQAdgBvAEsAcgBhADEANABiAFcAaABhAHQAIABpAHMAIABzAHQAYQB0AGkAbwBuAGEAcgB5ACAAZABlAGYAbwByAG0AYQB0AGkAbwBuAC4ALgBwAGQAZgAPABoADABNAGEAYwBpAG4AdABvAHMAaAAgAEgARAASAExVc2Vycy93Ymx1bS9Eb2N1bWVudHMvcGFwZXJzL0JsdUR2b0tyYTE0YldoYXQgaXMgc3RhdGlvbmFyeSBkZWZvcm1hdGlvbi4ucGRmABMAAS8AABUAAgAM//8AAAAIAA0AGgAkAHUAAAAAAAACAQAAAAAAAAAFAAAAAAAAAAAAAAAAAAACTQ==},
	Bdsk-File-4 = {YnBsaXN0MDDSAQIDBFxyZWxhdGl2ZVBhdGhZYWxpYXNEYXRhXxBOLi4vLi4vLi4vLi4vLi4vLi4vLi4vLi4vcGFwZXJzL0JsdUR2b0tyYTE0YVdoYXQgaXMgc3RhdGlvbmFyeSBkZWZvcm1hdGlvbi4ucGRmTxEB1AAAAAAB1AACAAAMTWFjaW50b3NoIEhEAAAAAAAAAAAAAAAAAAAAAAAAAEJEAAH/////H0JsdUR2b0tyYTE0YVdoYXQgaSNGRkZGRkZGRi5wZGYAAAAAAAAAAAAAAAAAAAAAAAAAAAAAAAAAAAAAAAAAAP////8AAAAAAAAAAAAAAAAACAACAAAKIGN1AAAAAAAAAAAAAAAAAAZwYXBlcnMAAgBOLzpVc2Vyczp3Ymx1bTpEb2N1bWVudHM6cGFwZXJzOkJsdUR2b0tyYTE0YVdoYXQgaXMgc3RhdGlvbmFyeSBkZWZvcm1hdGlvbi4ucGRmAA4AYAAvAEIAbAB1AEQAdgBvAEsAcgBhADEANABhAFcAaABhAHQAIABpAHMAIABzAHQAYQB0AGkAbwBuAGEAcgB5ACAAZABlAGYAbwByAG0AYQB0AGkAbwBuAC4ALgBwAGQAZgAPABoADABNAGEAYwBpAG4AdABvAHMAaAAgAEgARAASAExVc2Vycy93Ymx1bS9Eb2N1bWVudHMvcGFwZXJzL0JsdUR2b0tyYTE0YVdoYXQgaXMgc3RhdGlvbmFyeSBkZWZvcm1hdGlvbi4ucGRmABMAAS8AABUAAgAM//8AAAAIAA0AGgAkAHUAAAAAAAACAQAAAAAAAAAFAAAAAAAAAAAAAAAAAAACTQ==},
	Bdsk-File-5 = {YnBsaXN0MDDSAQIDBFxyZWxhdGl2ZVBhdGhZYWxpYXNEYXRhXxBNLi4vLi4vLi4vLi4vLi4vLi4vLi4vLi4vcGFwZXJzL0JsdUR2b0tyYTE0U3RhdGlvbmFyeSBkZWZvcm1hdGlvbiBvZiBwdXJlLi5wZGZPEQHSAAAAAAHSAAIAAAxNYWNpbnRvc2ggSEQAAAAAAAAAAAAAAAAAAAAAAAAAQkQAAf////8fQmx1RHZvS3JhMTRTdGF0aW9uI0ZGRkZGRkZGLnBkZgAAAAAAAAAAAAAAAAAAAAAAAAAAAAAAAAAAAAAAAAAA/////wAAAAAAAAAAAAAAAAAIAAIAAAogY3UAAAAAAAAAAAAAAAAABnBhcGVycwACAE0vOlVzZXJzOndibHVtOkRvY3VtZW50czpwYXBlcnM6Qmx1RHZvS3JhMTRTdGF0aW9uYXJ5IGRlZm9ybWF0aW9uIG9mIHB1cmUuLnBkZgAADgBeAC4AQgBsAHUARAB2AG8ASwByAGEAMQA0AFMAdABhAHQAaQBvAG4AYQByAHkAIABkAGUAZgBvAHIAbQBhAHQAaQBvAG4AIABvAGYAIABwAHUAcgBlAC4ALgBwAGQAZgAPABoADABNAGEAYwBpAG4AdABvAHMAaAAgAEgARAASAEtVc2Vycy93Ymx1bS9Eb2N1bWVudHMvcGFwZXJzL0JsdUR2b0tyYTE0U3RhdGlvbmFyeSBkZWZvcm1hdGlvbiBvZiBwdXJlLi5wZGYAABMAAS8AABUAAgAM//8AAAAIAA0AGgAkAHQAAAAAAAACAQAAAAAAAAAFAAAAAAAAAAAAAAAAAAACSg==},
	Bdsk-File-6 = {YnBsaXN0MDDSAQIDBFxyZWxhdGl2ZVBhdGhZYWxpYXNEYXRhXxBNLi4vLi4vLi4vLi4vLi4vLi4vLi4vLi4vcGFwZXJzL0JsdUR2b0tyYTE0V2hhdCBpcyBzdGF0aW9uYXJ5IGRlZm9ybWF0aW9uLi5wZGZPEQHSAAAAAAHSAAIAAAxNYWNpbnRvc2ggSEQAAAAAAAAAAAAAAAAAAAAAAAAAQkQAAf////8fQmx1RHZvS3JhMTRXaGF0IGlzI0ZGRkZGRkZGLnBkZgAAAAAAAAAAAAAAAAAAAAAAAAAAAAAAAAAAAAAAAAAA/////wAAAAAAAAAAAAAAAAAIAAIAAAogY3UAAAAAAAAAAAAAAAAABnBhcGVycwACAE0vOlVzZXJzOndibHVtOkRvY3VtZW50czpwYXBlcnM6Qmx1RHZvS3JhMTRXaGF0IGlzIHN0YXRpb25hcnkgZGVmb3JtYXRpb24uLnBkZgAADgBeAC4AQgBsAHUARAB2AG8ASwByAGEAMQA0AFcAaABhAHQAIABpAHMAIABzAHQAYQB0AGkAbwBuAGEAcgB5ACAAZABlAGYAbwByAG0AYQB0AGkAbwBuAC4ALgBwAGQAZgAPABoADABNAGEAYwBpAG4AdABvAHMAaAAgAEgARAASAEtVc2Vycy93Ymx1bS9Eb2N1bWVudHMvcGFwZXJzL0JsdUR2b0tyYTE0V2hhdCBpcyBzdGF0aW9uYXJ5IGRlZm9ybWF0aW9uLi5wZGYAABMAAS8AABUAAgAM//8AAAAIAA0AGgAkAHQAAAAAAAACAQAAAAAAAAAFAAAAAAAAAAAAAAAAAAACSg==}}

@article{DupSunBra18Dislocation-interactions-at-reduced,
	Author = {Maxime Dupraz and Zhen Sun and C. Brandl and Helena Van Swygenhoven},
	Date-Added = {2019-08-23 12:53:40 +0200},
	Date-Modified = {2019-08-23 12:53:40 +0200},
	Journal = {Acta Materialia},
	Pages = {68-79},
	Title = {Dislocation interactions at reduced strain rates in atomistic simulations of nanocrystalline Al},
	Volume = {144},
	Year = {2018},
	Bdsk-File-1 = {YnBsaXN0MDDSAQIDBFxyZWxhdGl2ZVBhdGhZYWxpYXNEYXRhXxBSLi4vLi4vLi4vLi4vLi4vLi4vLi4vLi4vcGFwZXJzL0R1cFN1bkJyYTE4RGlzbG9jYXRpb24gaW50ZXJhY3Rpb25zIGF0IHJlZHVjZWQuLnBkZk8RAeQAAAAAAeQAAgAADE1hY2ludG9zaCBIRAAAAAAAAAAAAAAAAAAAAAAAAABCRAAB/////x9EdXBTdW5CcmExOERpc2xvY2EjRkZGRkZGRkYucGRmAAAAAAAAAAAAAAAAAAAAAAAAAAAAAAAAAAAAAAAAAAD/////AAAAAAAAAAAAAAAAAAgAAgAACiBjdQAAAAAAAAAAAAAAAAAGcGFwZXJzAAIAUi86VXNlcnM6d2JsdW06RG9jdW1lbnRzOnBhcGVyczpEdXBTdW5CcmExOERpc2xvY2F0aW9uIGludGVyYWN0aW9ucyBhdCByZWR1Y2VkLi5wZGYADgBoADMARAB1AHAAUwB1AG4AQgByAGEAMQA4AEQAaQBzAGwAbwBjAGEAdABpAG8AbgAgAGkAbgB0AGUAcgBhAGMAdABpAG8AbgBzACAAYQB0ACAAcgBlAGQAdQBjAGUAZAAuAC4AcABkAGYADwAaAAwATQBhAGMAaQBuAHQAbwBzAGgAIABIAEQAEgBQVXNlcnMvd2JsdW0vRG9jdW1lbnRzL3BhcGVycy9EdXBTdW5CcmExOERpc2xvY2F0aW9uIGludGVyYWN0aW9ucyBhdCByZWR1Y2VkLi5wZGYAEwABLwAAFQACAAz//wAAAAgADQAaACQAeQAAAAAAAAIBAAAAAAAAAAUAAAAAAAAAAAAAAAAAAAJh}}

@article{ExWa72,
	Author = {Exell, S. F. and Warrington, D. H.},
	Citation-Origin = {Blum},
	Date-Added = {2019-08-23 12:47:48 +0200},
	Date-Modified = {2019-08-23 12:47:48 +0200},
	Journal = {Philos. Mag. A},
	Pages = {1121-1136},
	Title = {{S}ub-grain {B}oundary {M}igration in {A}luminum},
	Volume = {26},
	Year = {1972}}

@book{HuHa95,
	Address = {Oxford},
	Author = {Humphreys, F. J. and Hatherly, M.},
	Citation-Origin = {Blum},
	Date-Added = {2019-08-23 12:16:10 +0200},
	Date-Modified = {2019-08-23 12:16:10 +0200},
	Publisher = {Elsevier Science},
	Title = {Recrystallization and {R}elated {A}nnealing {P}henomena},
	Year = {1995}}

@book{Cad88,
	Address = {Amsterdam},
	Author = {\v{C}adek, J.},
	Citation-Origin = {Blum},
	Date-Added = {2019-08-23 12:05:09 +0200},
	Date-Modified = {2019-08-23 12:05:09 +0200},
	Publisher = {Elsevier},
	Title = {Creep in metallic materials},
	Year = {1988}}

@article{KaPe00,
	Author = {Kassner, M.E. and P{\'e}rez-Prado, M.-T.},
	Citation-Origin = {Blum},
	Date-Added = {2019-08-23 11:59:46 +0200},
	Date-Modified = {2019-08-23 11:59:46 +0200},
	Doi = {10.1016/S0079-6425(99)00006-7},
	Journal = {Progr. Mater. Sci.},
	Number = {1},
	Pages = {1-102},
	Title = {Five-Power-Law Creep in Single Phase Metals and Alloys},
	Volume = {45},
	Year = {2000},
	Bdsk-Url-1 = {http://dx.doi.org/10.1016/S0079-6425(99)00006-7}}

@inproceedings{VoBl90,
	Address = {London},
	Annote = {70, VoBl90, 4/90},
	Author = {Vogler, S. and Blum, W.},
	Booktitle = {Creep and Fracture of Engineering Materials and Structures},
	Date-Added = {2019-08-23 11:57:39 +0200},
	Date-Modified = {2019-08-23 11:57:39 +0200},
	Editor = {Wilshire, B. and Evans, R.W.},
	Pages = {65-79},
	Publisher = {The Institute of Metals},
	Title = {Micromechanical Modelling of Creep in Terms of the Composite Model},
	Year = {1990},
	Bdsk-File-1 = {YnBsaXN0MDDSAQIDBFxyZWxhdGl2ZVBhdGhZYWxpYXNEYXRhXxBPLi4vLi4vLi4vLi4vLi4vLi4vLi4vLi4vcGFwZXJzL1ZvZ0JsdTkwYU1pY3JvbWVjaGFuaWNhbCBNb2RlbGxpbmcgb2YgQ3JlZXAuLnBkZk8RAdoAAAAAAdoAAgAADE1hY2ludG9zaCBIRAAAAAAAAAAAAAAAAAAAAAAAAABCRAAB/////x9Wb2dCbHU5MGFNaWNyb21lY2gjRkZGRkZGRkYucGRmAAAAAAAAAAAAAAAAAAAAAAAAAAAAAAAAAAAAAAAAAAD/////AAAAAFBERiBDQVJPAAgAAgAACiBjdQAAAAAAAAAAAAAAAAAGcGFwZXJzAAIATy86VXNlcnM6d2JsdW06RG9jdW1lbnRzOnBhcGVyczpWb2dCbHU5MGFNaWNyb21lY2hhbmljYWwgTW9kZWxsaW5nIG9mIENyZWVwLi5wZGYAAA4AYgAwAFYAbwBnAEIAbAB1ADkAMABhAE0AaQBjAHIAbwBtAGUAYwBoAGEAbgBpAGMAYQBsACAATQBvAGQAZQBsAGwAaQBuAGcAIABvAGYAIABDAHIAZQBlAHAALgAuAHAAZABmAA8AGgAMAE0AYQBjAGkAbgB0AG8AcwBoACAASABEABIATVVzZXJzL3dibHVtL0RvY3VtZW50cy9wYXBlcnMvVm9nQmx1OTBhTWljcm9tZWNoYW5pY2FsIE1vZGVsbGluZyBvZiBDcmVlcC4ucGRmAAATAAEvAAAVAAIADP//AAAACAANABoAJAB2AAAAAAAAAgEAAAAAAAAABQAAAAAAAAAAAAAAAAAAAlQ=},
	Bdsk-File-2 = {YnBsaXN0MDDSAQIDBFxyZWxhdGl2ZVBhdGhZYWxpYXNEYXRhXxBOLi4vLi4vLi4vLi4vLi4vLi4vLi4vLi4vcGFwZXJzL1ZvZ0JsdTkwTWljcm9tZWNoYW5pY2FsIE1vZGVsbGluZyBvZiBDcmVlcC4ucGRmTxEB1AAAAAAB1AACAAAMTWFjaW50b3NoIEhEAAAAAAAAAAAAAAAAAAAAAAAAAEJEAAH/////H1ZvZ0JsdTkwTWljcm9tZWNoYSNGRkZGRkZGRi5wZGYAAAAAAAAAAAAAAAAAAAAAAAAAAAAAAAAAAAAAAAAAAP////8AAAAAAAAAAAAAAAAACAACAAAKIGN1AAAAAAAAAAAAAAAAAAZwYXBlcnMAAgBOLzpVc2Vyczp3Ymx1bTpEb2N1bWVudHM6cGFwZXJzOlZvZ0JsdTkwTWljcm9tZWNoYW5pY2FsIE1vZGVsbGluZyBvZiBDcmVlcC4ucGRmAA4AYAAvAFYAbwBnAEIAbAB1ADkAMABNAGkAYwByAG8AbQBlAGMAaABhAG4AaQBjAGEAbAAgAE0AbwBkAGUAbABsAGkAbgBnACAAbwBmACAAQwByAGUAZQBwAC4ALgBwAGQAZgAPABoADABNAGEAYwBpAG4AdABvAHMAaAAgAEgARAASAExVc2Vycy93Ymx1bS9Eb2N1bWVudHMvcGFwZXJzL1ZvZ0JsdTkwTWljcm9tZWNoYW5pY2FsIE1vZGVsbGluZyBvZiBDcmVlcC4ucGRmABMAAS8AABUAAgAM//8AAAAIAA0AGgAkAHUAAAAAAAACAQAAAAAAAAAFAAAAAAAAAAAAAAAAAAACTQ==}}

@article{MohLan74,
	Author = {Mohamed, F.A. and Langdon, T.G.},
	Date-Added = {2019-08-23 11:48:20 +0200},
	Date-Modified = {2019-08-23 11:48:20 +0200},
	Journal = {Acta metall.},
	Pages = {779},
	Volume = {22},
	Year = {1974}}

@article{HasKoc79,
	Author = {Hasegawa, T. and Kocks, U. F.},
	Citation-Origin = {Mekala},
	Date-Added = {2019-08-23 11:33:24 +0200},
	Date-Modified = {2019-08-23 11:33:24 +0200},
	Journal = {Acta Metall.},
	Local-Url = {file://localhost/Users/philip/Documents/publications/paper/HasKoc79_Thermal%20Recovery%20Pro..pdf},
	Pages = {1705-1716},
	Title = {{T}hermal {R}ecovery {P}rocesses in {D}eformed {A}luminum},
	Volume = {27},
	Year = {1979},
	Bdsk-File-1 = {YnBsaXN0MDDSAQIDBFxyZWxhdGl2ZVBhdGhZYWxpYXNEYXRhXxBGLi4vLi4vLi4vLi4vLi4vLi4vLi4vLi4vcGFwZXJzL0hhc0tvYzc5VGhlcm1hbCBSZWNvdmVyeSBQcm9jZXNzZXMuLnBkZk8RAbQAAAAAAbQAAgAADE1hY2ludG9zaCBIRAAAAAAAAAAAAAAAAAAAAAAAAABCRAAB/////x9IYXNLb2M3OVRoZXJtYWwgUmUjRkZGRkZGRkYucGRmAAAAAAAAAAAAAAAAAAAAAAAAAAAAAAAAAAAAAAAAAAD/////AAAAAAAAAAAAAAAAAAgAAgAACiBjdQAAAAAAAAAAAAAAAAAGcGFwZXJzAAIARi86VXNlcnM6d2JsdW06RG9jdW1lbnRzOnBhcGVyczpIYXNLb2M3OVRoZXJtYWwgUmVjb3ZlcnkgUHJvY2Vzc2VzLi5wZGYADgBQACcASABhAHMASwBvAGMANwA5AFQAaABlAHIAbQBhAGwAIABSAGUAYwBvAHYAZQByAHkAIABQAHIAbwBjAGUAcwBzAGUAcwAuAC4AcABkAGYADwAaAAwATQBhAGMAaQBuAHQAbwBzAGgAIABIAEQAEgBEVXNlcnMvd2JsdW0vRG9jdW1lbnRzL3BhcGVycy9IYXNLb2M3OVRoZXJtYWwgUmVjb3ZlcnkgUHJvY2Vzc2VzLi5wZGYAEwABLwAAFQACAAz//wAAAAgADQAaACQAbQAAAAAAAAIBAAAAAAAAAAUAAAAAAAAAAAAAAAAAAAIl}}

@article{HasYakKoc86,
	Author = {Hasegawa, T. and Yakou, T. and Kocks, U. F.},
	Citation-Origin = {Mekala},
	Date-Added = {2019-08-23 11:32:39 +0200},
	Date-Modified = {2019-08-23 11:32:39 +0200},
	Journal = {Mater. Sci. Eng.},
	Pages = {189-199},
	Title = {Forward and Reverse Rearrangements of Dislocations in Tangled walls},
	Volume = {81},
	Year = {1986},
	Bdsk-File-1 = {YnBsaXN0MDDSAQIDBFxyZWxhdGl2ZVBhdGhZYWxpYXNEYXRhXxBRLi4vLi4vLi4vLi4vLi4vLi4vLi4vLi4vcGFwZXJzL0hhc1lha0tvYzg2Rm9yd2FyZCBhbmQgUmV2ZXJzZSBSZWFycmFuZ2VtZW50cy4ucGRmTxEB4gAAAAAB4gACAAAMTWFjaW50b3NoIEhEAAAAAAAAAAAAAAAAAAAAAAAAAEJEAAH/////H0hhc1lha0tvYzg2Rm9yd2FyZCNGRkZGRkZGRi5wZGYAAAAAAAAAAAAAAAAAAAAAAAAAAAAAAAAAAAAAAAAAAP////8AAAAAAAAAAAAAAAAACAACAAAKIGN1AAAAAAAAAAAAAAAAAAZwYXBlcnMAAgBRLzpVc2Vyczp3Ymx1bTpEb2N1bWVudHM6cGFwZXJzOkhhc1lha0tvYzg2Rm9yd2FyZCBhbmQgUmV2ZXJzZSBSZWFycmFuZ2VtZW50cy4ucGRmAAAOAGYAMgBIAGEAcwBZAGEAawBLAG8AYwA4ADYARgBvAHIAdwBhAHIAZAAgAGEAbgBkACAAUgBlAHYAZQByAHMAZQAgAFIAZQBhAHIAcgBhAG4AZwBlAG0AZQBuAHQAcwAuAC4AcABkAGYADwAaAAwATQBhAGMAaQBuAHQAbwBzAGgAIABIAEQAEgBPVXNlcnMvd2JsdW0vRG9jdW1lbnRzL3BhcGVycy9IYXNZYWtLb2M4NkZvcndhcmQgYW5kIFJldmVyc2UgUmVhcnJhbmdlbWVudHMuLnBkZgAAEwABLwAAFQACAAz//wAAAAgADQAaACQAeAAAAAAAAAIBAAAAAAAAAAUAAAAAAAAAAAAAAAAAAAJe}}

@article{HasYakKoc82,
	Author = {Hasegawa, T. and Yakou, T. and Kocks, U.F.},
	Date-Added = {2019-08-23 11:32:12 +0200},
	Date-Modified = {2019-08-23 11:32:12 +0200},
	Journal = {Acta Metall.},
	Local-Url = {file://localhost/Users/philip/Documents/publications/paper/HasYakKoc82_Length%20changes%20and%20s..pdf},
	Pages = {235-243},
	Title = {Length changes and stress effects during recovery of deformed aluminum},
	Volume = {30},
	Year = {1982},
	Bdsk-File-1 = {YnBsaXN0MDDSAQIDBFxyZWxhdGl2ZVBhdGhZYWxpYXNEYXRhXxBILi4vLi4vLi4vLi4vLi4vLi4vLi4vLi4vcGFwZXJzL0hhc1lha0tvYzgyTGVuZ3RoIGNoYW5nZXMgYW5kIHN0cmVzcy4ucGRmTxEBvAAAAAABvAACAAAMTWFjaW50b3NoIEhEAAAAAAAAAAAAAAAAAAAAAAAAAEJEAAH/////H0hhc1lha0tvYzgyTGVuZ3RoICNGRkZGRkZGRi5wZGYAAAAAAAAAAAAAAAAAAAAAAAAAAAAAAAAAAAAAAAAAAP////8AAAAAAAAAAAAAAAAACAACAAAKIGN1AAAAAAAAAAAAAAAAAAZwYXBlcnMAAgBILzpVc2Vyczp3Ymx1bTpEb2N1bWVudHM6cGFwZXJzOkhhc1lha0tvYzgyTGVuZ3RoIGNoYW5nZXMgYW5kIHN0cmVzcy4ucGRmAA4AVAApAEgAYQBzAFkAYQBrAEsAbwBjADgAMgBMAGUAbgBnAHQAaAAgAGMAaABhAG4AZwBlAHMAIABhAG4AZAAgAHMAdAByAGUAcwBzAC4ALgBwAGQAZgAPABoADABNAGEAYwBpAG4AdABvAHMAaAAgAEgARAASAEZVc2Vycy93Ymx1bS9Eb2N1bWVudHMvcGFwZXJzL0hhc1lha0tvYzgyTGVuZ3RoIGNoYW5nZXMgYW5kIHN0cmVzcy4ucGRmABMAAS8AABUAAgAM//8AAAAIAA0AGgAkAG8AAAAAAAACAQAAAAAAAAAFAAAAAAAAAAAAAAAAAAACLw==}}

@article{MuBiBl92,
	Annote = {74,MuBiBl92,19/92},
	Author = {M{\"u}ller, W. and Biberger, M. and Blum, W.},
	Date-Added = {2019-08-23 11:16:38 +0200},
	Date-Modified = {2019-08-23 11:16:38 +0200},
	Journal = {Philos. Mag. A},
	Pages = {717-728},
	Title = {Subgrain Boundary Migration during Creep of {LiF}, {III}. Stress Reduction Experiments},
	Volume = {66},
	Year = {1992},
	Bdsk-File-1 = {YnBsaXN0MDDSAQIDBFxyZWxhdGl2ZVBhdGhZYWxpYXNEYXRhbxBLAC4ALgAvAC4ALgAvAC4ALgAvAC4ALgAvAC4ALgAvAC4ALgAvAC4ALgAvAC4ALgAvAHAAYQBwAGUAcgBzAC8ATQB1AwgAbABCAGkAYgBCAGwAdQA5ADIAUwB1AGIAZwByAGEAaQBuACAAQgBvAHUAbgBkAGEAcgB5ACAATQBpAGcAcgBhAHQAaQBvAG4ALgAuAHAAZABmTxEBygAAAAABygACAAAMTWFjaW50b3NoIEhEAAAAAAAAAAAAAAAAAAAAAAAAAEJEAAH/////H02fbEJpYkJsdTkyU3ViZ3JhaSNGRkZGRkZGRi5wZGYAAAAAAAAAAAAAAAAAAAAAAAAAAAAAAAAAAAAAAAAAAP////8AAAAAAAAAAAAAAAAACAACAAAKIGN1AAAAAAAAAAAAAAAAAAZwYXBlcnMAAgBMLzpVc2Vyczp3Ymx1bTpEb2N1bWVudHM6cGFwZXJzOk11zIhsQmliQmx1OTJTdWJncmFpbiBCb3VuZGFyeSBNaWdyYXRpb24uLnBkZgAOAFoALABNAHUDCABsAEIAaQBiAEIAbAB1ADkAMgBTAHUAYgBnAHIAYQBpAG4AIABCAG8AdQBuAGQAYQByAHkAIABNAGkAZwByAGEAdABpAG8AbgAuAC4AcABkAGYADwAaAAwATQBhAGMAaQBuAHQAbwBzAGgAIABIAEQAEgBKVXNlcnMvd2JsdW0vRG9jdW1lbnRzL3BhcGVycy9NdcyIbEJpYkJsdTkyU3ViZ3JhaW4gQm91bmRhcnkgTWlncmF0aW9uLi5wZGYAEwABLwAAFQACAAz//wAAAAgADQAaACQAvQAAAAAAAAIBAAAAAAAAAAUAAAAAAAAAAAAAAAAAAAKL},
	Bdsk-File-2 = {YnBsaXN0MDDSAQIDBFxyZWxhdGl2ZVBhdGhZYWxpYXNEYXRhXxAzLi4vLi4vLi4vLi4vLi4vLi4vLi4vLi4vcGFwZXJzL011QmlCbDkyLVBhcnRJSUkucGRmTxEBagAAAAABagACAAAMTWFjaW50b3NoIEhEAAAAAAAAAAAAAAAAAAAAAAAAAEJEAAH/////FE11QmlCbDkyLVBhcnRJSUkucGRmAAAAAAAAAAAAAAAAAAAAAAAAAAAAAAAAAAAAAAAAAAAAAAAAAAAAAAAAAP////8AAAAAAAAAAAAAAAAACAACAAAKIGN1AAAAAAAAAAAAAAAAAAZwYXBlcnMAAgAzLzpVc2Vyczp3Ymx1bTpEb2N1bWVudHM6cGFwZXJzOk11QmlCbDkyLVBhcnRJSUkucGRmAAAOACoAFABNAHUAQgBpAEIAbAA5ADIALQBQAGEAcgB0AEkASQBJAC4AcABkAGYADwAaAAwATQBhAGMAaQBuAHQAbwBzAGgAIABIAEQAEgAxVXNlcnMvd2JsdW0vRG9jdW1lbnRzL3BhcGVycy9NdUJpQmw5Mi1QYXJ0SUlJLnBkZgAAEwABLwAAFQACAAz//wAAAAgADQAaACQAWgAAAAAAAAIBAAAAAAAAAAUAAAAAAAAAAAAAAAAAAAHI}}

@article{Ca84,
	Author = {Caillard, D.},
	Citation-Origin = {Blum},
	Date-Added = {2019-08-23 09:31:04 +0200},
	Date-Modified = {2019-08-23 09:31:04 +0200},
	Journal = {Acta metall.},
	Pages = {1483-1491},
	Title = {\protect{In situ creep experiments in weak beam conditions, in Al at intermediate temperature, Interaction of dislocations with subboundaries}},
	Volume = {32},
	Year = {1984},
	Bdsk-File-1 = {YnBsaXN0MDDSAQIDBFxyZWxhdGl2ZVBhdGhZYWxpYXNEYXRhXxBDLi4vLi4vLi4vLi4vLi4vLi4vLi4vLi4vcGFwZXJzL0NhaTg0YUluIHNpdHUgY3JlZXAgZXhwZXJpbWVudHMuLnBkZk8RAaoAAAAAAaoAAgAADE1hY2ludG9zaCBIRAAAAAAAAAAAAAAAAAAAAAAAAABCRAAB/////x9DYWk4NGFJbiBzaXR1IGNyZWUjRkZGRkZGRkYucGRmAAAAAAAAAAAAAAAAAAAAAAAAAAAAAAAAAAAAAAAAAAD/////AAAAAAAAAAAAAAAAAAgAAgAACiBjdQAAAAAAAAAAAAAAAAAGcGFwZXJzAAIAQy86VXNlcnM6d2JsdW06RG9jdW1lbnRzOnBhcGVyczpDYWk4NGFJbiBzaXR1IGNyZWVwIGV4cGVyaW1lbnRzLi5wZGYAAA4ASgAkAEMAYQBpADgANABhAEkAbgAgAHMAaQB0AHUAIABjAHIAZQBlAHAAIABlAHgAcABlAHIAaQBtAGUAbgB0AHMALgAuAHAAZABmAA8AGgAMAE0AYQBjAGkAbgB0AG8AcwBoACAASABEABIAQVVzZXJzL3dibHVtL0RvY3VtZW50cy9wYXBlcnMvQ2FpODRhSW4gc2l0dSBjcmVlcCBleHBlcmltZW50cy4ucGRmAAATAAEvAAAVAAIADP//AAAACAANABoAJABqAAAAAAAAAgEAAAAAAAAABQAAAAAAAAAAAAAAAAAAAhg=}}

@article{LinMie67,
	Author = {Lindroos, V.K. and Miekk-oja, H.M.},
	Date-Added = {2019-08-23 09:27:09 +0200},
	Date-Modified = {2019-08-23 09:27:09 +0200},
	Journal = {Phil. Mag.},
	Pages = {593},
	Volume = {16},
	Year = {1967}}

@article{ShBu68,
	Author = {Sherby, O. D. and Burke, P. M.},
	Citation-Origin = {Blum},
	Date-Added = {2019-08-23 09:05:01 +0200},
	Date-Modified = {2019-08-23 09:05:01 +0200},
	Doi = {10.1016/0079-6425(68)90024-8},
	Journal = {Progr. Mater. Sci.},
	Pages = {323-390},
	Title = {Mechanical {B}ehaviour of {C}rystalline {S}olids at {E}levated {T}emperature},
	Volume = {13},
	Year = {1968},
	Bdsk-Url-1 = {http://dx.doi.org/10.1016/0079-6425(68)90024-8}}

@article{Bl77,
	Annote = {18,Bl77},
	Author = {Blum, W.},
	Date-Added = {2019-08-23 06:40:25 +0200},
	Date-Modified = {2019-08-23 06:40:25 +0200},
	Journal = {Z. Metallkde.},
	Pages = {484-492},
	Title = {Dislocation Models of Plastic Deformation of Metals at Elevated Temperatures},
	Volume = {68},
	Year = {1977},
	Bdsk-File-1 = {YnBsaXN0MDDSAQIDBFxyZWxhdGl2ZVBhdGhZYWxpYXNEYXRhXxBHLi4vLi4vLi4vLi4vLi4vLi4vLi4vLi4vcGFwZXJzL0JsdTc3YURpc2xvY2F0aW9uIE1vZGVscyBvZiBQbGFzdGljLi5wZGZPEQG6AAAAAAG6AAIAAAxNYWNpbnRvc2ggSEQAAAAAAAAAAAAAAAAAAAAAAAAAQkQAAf////8fQmx1NzdhRGlzbG9jYXRpb24gI0ZGRkZGRkZGLnBkZgAAAAAAAAAAAAAAAAAAAAAAAAAAAAAAAAAAAAAAAAAA/////wAAAABQREYgQ0FSTwAIAAIAAAogY3UAAAAAAAAAAAAAAAAABnBhcGVycwACAEcvOlVzZXJzOndibHVtOkRvY3VtZW50czpwYXBlcnM6Qmx1NzdhRGlzbG9jYXRpb24gTW9kZWxzIG9mIFBsYXN0aWMuLnBkZgAADgBSACgAQgBsAHUANwA3AGEARABpAHMAbABvAGMAYQB0AGkAbwBuACAATQBvAGQAZQBsAHMAIABvAGYAIABQAGwAYQBzAHQAaQBjAC4ALgBwAGQAZgAPABoADABNAGEAYwBpAG4AdABvAHMAaAAgAEgARAASAEVVc2Vycy93Ymx1bS9Eb2N1bWVudHMvcGFwZXJzL0JsdTc3YURpc2xvY2F0aW9uIE1vZGVscyBvZiBQbGFzdGljLi5wZGYAABMAAS8AABUAAgAM//8AAAAIAA0AGgAkAG4AAAAAAAACAQAAAAAAAAAFAAAAAAAAAAAAAAAAAAACLA==},
	Bdsk-File-2 = {YnBsaXN0MDDSAQIDBFxyZWxhdGl2ZVBhdGhZYWxpYXNEYXRhXxBGLi4vLi4vLi4vLi4vLi4vLi4vLi4vLi4vcGFwZXJzL0JsdTc3RGlzbG9jYXRpb24gTW9kZWxzIG9mIFBsYXN0aWMuLnBkZk8RAbQAAAAAAbQAAgAADE1hY2ludG9zaCBIRAAAAAAAAAAAAAAAAAAAAAAAAABCRAAB/////x9CbHU3N0Rpc2xvY2F0aW9uIE0jRkZGRkZGRkYucGRmAAAAAAAAAAAAAAAAAAAAAAAAAAAAAAAAAAAAAAAAAAD/////AAAAAAAAAAAqKioqAAgAAgAACiBjdQAAAAAAAAAAAAAAAAAGcGFwZXJzAAIARi86VXNlcnM6d2JsdW06RG9jdW1lbnRzOnBhcGVyczpCbHU3N0Rpc2xvY2F0aW9uIE1vZGVscyBvZiBQbGFzdGljLi5wZGYADgBQACcAQgBsAHUANwA3AEQAaQBzAGwAbwBjAGEAdABpAG8AbgAgAE0AbwBkAGUAbABzACAAbwBmACAAUABsAGEAcwB0AGkAYwAuAC4AcABkAGYADwAaAAwATQBhAGMAaQBuAHQAbwBzAGgAIABIAEQAEgBEVXNlcnMvd2JsdW0vRG9jdW1lbnRzL3BhcGVycy9CbHU3N0Rpc2xvY2F0aW9uIE1vZGVscyBvZiBQbGFzdGljLi5wZGYAEwABLwAAFQACAAz//wAAAAgADQAaACQAbQAAAAAAAAIBAAAAAAAAAAUAAAAAAAAAAAAAAAAAAAIl}}

@article{PetBraSch09Creep-in-nanocrystalline-Ni-during,
	Author = {S. Van Petegem and S. Brandstetter and B. Schmitt and H. Van Swygenhoven},
	Date-Added = {2019-08-23 06:35:14 +0200},
	Date-Modified = {2019-08-23 06:35:14 +0200},
	Doi = {10.1016/j.scriptamat.2008.10.034},
	Journal = {Scripta Materialia},
	Pages = {297--300},
	Title = {Creep in nanocrystalline {N}i during {X}-ray diffraction},
	Volume = {60},
	Year = {2009},
	Bdsk-File-1 = {YnBsaXN0MDDSAQIDBFxyZWxhdGl2ZVBhdGhZYWxpYXNEYXRhXxBRLi4vLi4vLi4vLi4vLi4vLi4vLi4vLi4vcGFwZXJzL1BldEJyYVNjaDA5Q3JlZXAgaW4gbmFub2NyeXN0YWxsaW5lIE5pIGR1cmluZy4ucGRmTxEB4gAAAAAB4gACAAAMTWFjaW50b3NoIEhEAAAAAAAAAAAAAAAAAAAAAAAAAEJEAAH/////H1BldEJyYVNjaDA5Q3JlZXAgaSNGRkZGRkZGRi5wZGYAAAAAAAAAAAAAAAAAAAAAAAAAAAAAAAAAAAAAAAAAAP////8AAAAAAAAAAAAAAAAACAACAAAKIGN1AAAAAAAAAAAAAAAAAAZwYXBlcnMAAgBRLzpVc2Vyczp3Ymx1bTpEb2N1bWVudHM6cGFwZXJzOlBldEJyYVNjaDA5Q3JlZXAgaW4gbmFub2NyeXN0YWxsaW5lIE5pIGR1cmluZy4ucGRmAAAOAGYAMgBQAGUAdABCAHIAYQBTAGMAaAAwADkAQwByAGUAZQBwACAAaQBuACAAbgBhAG4AbwBjAHIAeQBzAHQAYQBsAGwAaQBuAGUAIABOAGkAIABkAHUAcgBpAG4AZwAuAC4AcABkAGYADwAaAAwATQBhAGMAaQBuAHQAbwBzAGgAIABIAEQAEgBPVXNlcnMvd2JsdW0vRG9jdW1lbnRzL3BhcGVycy9QZXRCcmFTY2gwOUNyZWVwIGluIG5hbm9jcnlzdGFsbGluZSBOaSBkdXJpbmcuLnBkZgAAEwABLwAAFQACAAz//wAAAAgADQAaACQAeAAAAAAAAAIBAAAAAAAAAAUAAAAAAAAAAAAAAAAAAAJe}}

@article{Blu17Discussion:-activation-volumes,
	Annote = {SMM-17-1679
editor handling: Prof. David Rodney

article's reference number SMM 11863

VG Wort gemeldet},
	Author = {W. Blum},
	Date-Added = {2019-08-22 10:49:43 +0200},
	Date-Modified = {2019-08-22 10:49:43 +0200},
	Doi = {https://doi.org/10.1016/j.scriptamat.2017.10.029},
	Issn = {1359-6462},
	Journal = {Scripta mater.},
	Keywords = {activation volume, UFG Cu},
	Local-Url = {/Users/wblum/Documents/Texte/Publikationen/papers_In_Arbeit/Blu16ActivationAnalysisCu/paper/shortPaper},
	Pages = {27--30},
	Title = {Discussion: activation volumes of plastic deformation of crystals},
	Volume = {146},
	Year = {2018},
	Bdsk-File-1 = {YnBsaXN0MDDSAQIDBFxyZWxhdGl2ZVBhdGhZYWxpYXNEYXRhXxBHLi4vLi4vLi4vLi4vLi4vLi4vLi4vLi4vcGFwZXJzL0JsdTE3ZERpc2N1c3Npb24gYWN0aXZhdGlvbiB2b2x1bWVzLi5wZGZPEQG6AAAAAAG6AAIAAAxNYWNpbnRvc2ggSEQAAAAAAAAAAAAAAAAAAAAAAAAAQkQAAf////8fQmx1MTdkRGlzY3Vzc2lvbiBhI0ZGRkZGRkZGLnBkZgAAAAAAAAAAAAAAAAAAAAAAAAAAAAAAAAAAAAAAAAAA/////wAAAAAAAAAAAAAAAAAIAAIAAAogY3UAAAAAAAAAAAAAAAAABnBhcGVycwACAEcvOlVzZXJzOndibHVtOkRvY3VtZW50czpwYXBlcnM6Qmx1MTdkRGlzY3Vzc2lvbiBhY3RpdmF0aW9uIHZvbHVtZXMuLnBkZgAADgBSACgAQgBsAHUAMQA3AGQARABpAHMAYwB1AHMAcwBpAG8AbgAgAGEAYwB0AGkAdgBhAHQAaQBvAG4AIAB2AG8AbAB1AG0AZQBzAC4ALgBwAGQAZgAPABoADABNAGEAYwBpAG4AdABvAHMAaAAgAEgARAASAEVVc2Vycy93Ymx1bS9Eb2N1bWVudHMvcGFwZXJzL0JsdTE3ZERpc2N1c3Npb24gYWN0aXZhdGlvbiB2b2x1bWVzLi5wZGYAABMAAS8AABUAAgAM//8AAAAIAA0AGgAkAG4AAAAAAAACAQAAAAAAAAAFAAAAAAAAAAAAAAAAAAACLA==},
	Bdsk-File-2 = {YnBsaXN0MDDSAQIDBFxyZWxhdGl2ZVBhdGhZYWxpYXNEYXRhXxBHLi4vLi4vLi4vLi4vLi4vLi4vLi4vLi4vcGFwZXJzL0JsdTE3Y0Rpc2N1c3Npb24gYWN0aXZhdGlvbiB2b2x1bWVzLi5wZGZPEQG6AAAAAAG6AAIAAAxNYWNpbnRvc2ggSEQAAAAAAAAAAAAAAAAAAAAAAAAAQkQAAf////8fQmx1MTdjRGlzY3Vzc2lvbiBhI0ZGRkZGRkZGLnBkZgAAAAAAAAAAAAAAAAAAAAAAAAAAAAAAAAAAAAAAAAAA/////wAAAAAAAAAAAAAAAAAIAAIAAAogY3UAAAAAAAAAAAAAAAAABnBhcGVycwACAEcvOlVzZXJzOndibHVtOkRvY3VtZW50czpwYXBlcnM6Qmx1MTdjRGlzY3Vzc2lvbiBhY3RpdmF0aW9uIHZvbHVtZXMuLnBkZgAADgBSACgAQgBsAHUAMQA3AGMARABpAHMAYwB1AHMAcwBpAG8AbgAgAGEAYwB0AGkAdgBhAHQAaQBvAG4AIAB2AG8AbAB1AG0AZQBzAC4ALgBwAGQAZgAPABoADABNAGEAYwBpAG4AdABvAHMAaAAgAEgARAASAEVVc2Vycy93Ymx1bS9Eb2N1bWVudHMvcGFwZXJzL0JsdTE3Y0Rpc2N1c3Npb24gYWN0aXZhdGlvbiB2b2x1bWVzLi5wZGYAABMAAS8AABUAAgAM//8AAAAIAA0AGgAkAG4AAAAAAAACAQAAAAAAAAAFAAAAAAAAAAAAAAAAAAACLA==},
	Bdsk-File-3 = {YnBsaXN0MDDSAQIDBFxyZWxhdGl2ZVBhdGhZYWxpYXNEYXRhXxBHLi4vLi4vLi4vLi4vLi4vLi4vLi4vLi4vcGFwZXJzL0JsdTE3YkRpc2N1c3Npb24gYWN0aXZhdGlvbiB2b2x1bWVzLi5wZGZPEQG6AAAAAAG6AAIAAAxNYWNpbnRvc2ggSEQAAAAAAAAAAAAAAAAAAAAAAAAAQkQAAf////8fQmx1MTdiRGlzY3Vzc2lvbiBhI0ZGRkZGRkZGLnBkZgAAAAAAAAAAAAAAAAAAAAAAAAAAAAAAAAAAAAAAAAAA/////wAAAAAAAAAAAAAAAAAIAAIAAAogY3UAAAAAAAAAAAAAAAAABnBhcGVycwACAEcvOlVzZXJzOndibHVtOkRvY3VtZW50czpwYXBlcnM6Qmx1MTdiRGlzY3Vzc2lvbiBhY3RpdmF0aW9uIHZvbHVtZXMuLnBkZgAADgBSACgAQgBsAHUAMQA3AGIARABpAHMAYwB1AHMAcwBpAG8AbgAgAGEAYwB0AGkAdgBhAHQAaQBvAG4AIAB2AG8AbAB1AG0AZQBzAC4ALgBwAGQAZgAPABoADABNAGEAYwBpAG4AdABvAHMAaAAgAEgARAASAEVVc2Vycy93Ymx1bS9Eb2N1bWVudHMvcGFwZXJzL0JsdTE3YkRpc2N1c3Npb24gYWN0aXZhdGlvbiB2b2x1bWVzLi5wZGYAABMAAS8AABUAAgAM//8AAAAIAA0AGgAkAG4AAAAAAAACAQAAAAAAAAAFAAAAAAAAAAAAAAAAAAACLA==},
	Bdsk-File-4 = {YnBsaXN0MDDSAQIDBFxyZWxhdGl2ZVBhdGhZYWxpYXNEYXRhXxBHLi4vLi4vLi4vLi4vLi4vLi4vLi4vLi4vcGFwZXJzL0JsdTE3YURpc2N1c3Npb24gYWN0aXZhdGlvbiB2b2x1bWVzLi5wZGZPEQG6AAAAAAG6AAIAAAxNYWNpbnRvc2ggSEQAAAAAAAAAAAAAAAAAAAAAAAAAQkQAAf////8fQmx1MTdhRGlzY3Vzc2lvbiBhI0ZGRkZGRkZGLnBkZgAAAAAAAAAAAAAAAAAAAAAAAAAAAAAAAAAAAAAAAAAA/////wAAAAAAAAAAAAAAAAAIAAIAAAogY3UAAAAAAAAAAAAAAAAABnBhcGVycwACAEcvOlVzZXJzOndibHVtOkRvY3VtZW50czpwYXBlcnM6Qmx1MTdhRGlzY3Vzc2lvbiBhY3RpdmF0aW9uIHZvbHVtZXMuLnBkZgAADgBSACgAQgBsAHUAMQA3AGEARABpAHMAYwB1AHMAcwBpAG8AbgAgAGEAYwB0AGkAdgBhAHQAaQBvAG4AIAB2AG8AbAB1AG0AZQBzAC4ALgBwAGQAZgAPABoADABNAGEAYwBpAG4AdABvAHMAaAAgAEgARAASAEVVc2Vycy93Ymx1bS9Eb2N1bWVudHMvcGFwZXJzL0JsdTE3YURpc2N1c3Npb24gYWN0aXZhdGlvbiB2b2x1bWVzLi5wZGYAABMAAS8AABUAAgAM//8AAAAIAA0AGgAkAG4AAAAAAAACAQAAAAAAAAAFAAAAAAAAAAAAAAAAAAACLA==}}

@article{BlRoCeMa89,
	Annote = {60,BlRoCeMa89,11/89},
	Author = {Blum, W. and Rosen, A. and Cegielska, A. and Martin, J. L.},
	Date-Added = {2019-08-22 10:48:58 +0200},
	Date-Modified = {2019-08-22 10:48:58 +0200},
	Journal = {Acta metall.},
	Pages = {2439-2453},
	Title = {Two mechanisms of dislocation motion during creep},
	Volume = {37},
	Year = {1989},
	Bdsk-File-1 = {YnBsaXN0MDDSAQIDBFxyZWxhdGl2ZVBhdGhZYWxpYXNEYXRhXxBTLi4vLi4vLi4vLi4vLi4vLi4vLi4vLi4vcGFwZXJzL0JsdVJvc0NlZzg5VHdvIG1lY2hhbmlzbXMgb2YgZGlzbG9jYXRpb24gbW90aW9uLi5wZGZPEQHqAAAAAAHqAAIAAAxNYWNpbnRvc2ggSEQAAAAAAAAAAAAAAAAAAAAAAAAAQkQAAf////8fQmx1Um9zQ2VnODlUd28gbWVjI0ZGRkZGRkZGLnBkZgAAAAAAAAAAAAAAAAAAAAAAAAAAAAAAAAAAAAAAAAAA/////wAAAAAAAAAAAAAAAAAIAAIAAAogY3UAAAAAAAAAAAAAAAAABnBhcGVycwACAFMvOlVzZXJzOndibHVtOkRvY3VtZW50czpwYXBlcnM6Qmx1Um9zQ2VnODlUd28gbWVjaGFuaXNtcyBvZiBkaXNsb2NhdGlvbiBtb3Rpb24uLnBkZgAADgBqADQAQgBsAHUAUgBvAHMAQwBlAGcAOAA5AFQAdwBvACAAbQBlAGMAaABhAG4AaQBzAG0AcwAgAG8AZgAgAGQAaQBzAGwAbwBjAGEAdABpAG8AbgAgAG0AbwB0AGkAbwBuAC4ALgBwAGQAZgAPABoADABNAGEAYwBpAG4AdABvAHMAaAAgAEgARAASAFFVc2Vycy93Ymx1bS9Eb2N1bWVudHMvcGFwZXJzL0JsdVJvc0NlZzg5VHdvIG1lY2hhbmlzbXMgb2YgZGlzbG9jYXRpb24gbW90aW9uLi5wZGYAABMAAS8AABUAAgAM//8AAAAIAA0AGgAkAHoAAAAAAAACAQAAAAAAAAAFAAAAAAAAAAAAAAAAAAACaA==}}

@article{BluWec87,
	Annote = {55,BlWe87, 4/87},
	Author = {Blum, W. and Weckert, E.},
	Date-Added = {2019-08-22 10:48:15 +0200},
	Date-Modified = {2019-08-22 10:48:15 +0200},
	Journal = {Mater. Sci. Eng.},
	Pages = {145-158},
	Title = {On the Interpretation of the 'Internal Stress' determined from Dip Tests during Creep of {A}l-5 {at\%} {M}g},
	Volume = {23},
	Year = {1987},
	Bdsk-File-1 = {YnBsaXN0MDDSAQIDBFxyZWxhdGl2ZVBhdGhZYWxpYXNEYXRhXxBaLi4vLi4vLi4vLi4vLi4vLi4vLi4vLi4vcGFwZXJzL0JsdVdlYzg3T24gdGhlIEludGVycHJldGF0aW9uIG9mIHRoZSAnSW50ZXJuYWwgU3RyZXNzJy4ucGRmTxECBAAAAAACBAACAAAMTWFjaW50b3NoIEhEAAAAAAAAAAAAAAAAAAAAAAAAAEJEAAH/////H0JsdVdlYzg3T24gdGhlIEludCNGRkZGRkZGRi5wZGYAAAAAAAAAAAAAAAAAAAAAAAAAAAAAAAAAAAAAAAAAAP////8AAAAAAAAAAAAAAAAACAACAAAKIGN1AAAAAAAAAAAAAAAAAAZwYXBlcnMAAgBaLzpVc2Vyczp3Ymx1bTpEb2N1bWVudHM6cGFwZXJzOkJsdVdlYzg3T24gdGhlIEludGVycHJldGF0aW9uIG9mIHRoZSAnSW50ZXJuYWwgU3RyZXNzJy4ucGRmAA4AeAA7AEIAbAB1AFcAZQBjADgANwBPAG4AIAB0AGgAZQAgAEkAbgB0AGUAcgBwAHIAZQB0AGEAdABpAG8AbgAgAG8AZgAgAHQAaABlACAAJwBJAG4AdABlAHIAbgBhAGwAIABTAHQAcgBlAHMAcwAnAC4ALgBwAGQAZgAPABoADABNAGEAYwBpAG4AdABvAHMAaAAgAEgARAASAFhVc2Vycy93Ymx1bS9Eb2N1bWVudHMvcGFwZXJzL0JsdVdlYzg3T24gdGhlIEludGVycHJldGF0aW9uIG9mIHRoZSAnSW50ZXJuYWwgU3RyZXNzJy4ucGRmABMAAS8AABUAAgAM//8AAAAIAA0AGgAkAIEAAAAAAAACAQAAAAAAAAAFAAAAAAAAAAAAAAAAAAACiQ==}}

@inproceedings{WecBlu85,
	Address = {London},
	Annote = {53,WeBl85, 6/85},
	Author = {Weckert, E. and Blum, W.},
	Booktitle = {Proc. 7th Int. Conf. on the Strength of Metals and Alloys (ICSMA 7), Vol. 1},
	Date-Added = {2019-08-22 10:47:37 +0200},
	Date-Modified = {2019-08-22 10:47:37 +0200},
	Editor = {McQueen, H. J. and Bailon, J.-P. and Dickson, J. I. and Jonas, J. J. and Akben, M. G.},
	Local-Url = {/Users/wblum/Documents/Texte/Publikationen/papers_In_Arbeit/WecBlu-Al5Mg},
	Pages = {773-778},
	Publisher = {Pergamon Press},
	Title = {Transient Creep of an {Al}-5 at\%{Mg} Solid Solution},
	Year = {1985},
	Bdsk-File-1 = {YnBsaXN0MDDSAQIDBFxyZWxhdGl2ZVBhdGhZYWxpYXNEYXRhXxBGLi4vLi4vLi4vLi4vLi4vLi4vLi4vLi4vcGFwZXJzL1dlY0JsdTg1VHJhbnNpZW50IENyZWVwIG9mIGFuIEFsLTUuLnBkZk8RAbQAAAAAAbQAAgAADE1hY2ludG9zaCBIRAAAAAAAAAAAAAAAAAAAAAAAAABCRAAB/////x9XZWNCbHU4NVRyYW5zaWVudCAjRkZGRkZGRkYucGRmAAAAAAAAAAAAAAAAAAAAAAAAAAAAAAAAAAAAAAAAAAD/////AAAAAAAAAAAAAAAAAAgAAgAACiBjdQAAAAAAAAAAAAAAAAAGcGFwZXJzAAIARi86VXNlcnM6d2JsdW06RG9jdW1lbnRzOnBhcGVyczpXZWNCbHU4NVRyYW5zaWVudCBDcmVlcCBvZiBhbiBBbC01Li5wZGYADgBQACcAVwBlAGMAQgBsAHUAOAA1AFQAcgBhAG4AcwBpAGUAbgB0ACAAQwByAGUAZQBwACAAbwBmACAAYQBuACAAQQBsAC0ANQAuAC4AcABkAGYADwAaAAwATQBhAGMAaQBuAHQAbwBzAGgAIABIAEQAEgBEVXNlcnMvd2JsdW0vRG9jdW1lbnRzL3BhcGVycy9XZWNCbHU4NVRyYW5zaWVudCBDcmVlcCBvZiBhbiBBbC01Li5wZGYAEwABLwAAFQACAAz//wAAAAgADQAaACQAbQAAAAAAAAIBAAAAAAAAAAUAAAAAAAAAAAAAAAAAAAIl}}

@article{Nes98,
	Annote = {fr{\"u}her Ne98},
	Author = {Nes, E.},
	Citation-Origin = {Blum},
	Date-Added = {2019-08-22 10:47:03 +0200},
	Date-Modified = {2019-08-22 10:47:03 +0200},
	Doi = {10.1016/S0079-6425(97)00032-7},
	Journal = {Progr. Mater. Sci.},
	Number = {3},
	Pages = {129-193},
	Title = {Modelling work hardening and stress saturation in {FCC} metals},
	Volume = {41},
	Year = {1998},
	Bdsk-File-1 = {YnBsaXN0MDDSAQIDBFxyZWxhdGl2ZVBhdGhZYWxpYXNEYXRhXxBBLi4vLi4vLi4vLi4vLi4vLi4vLi4vLi4vcGFwZXJzL05lczk4TW9kZWxsaW5nIHdvcmsgaGFyZGVuaW5nLi5wZGZPEQGiAAAAAAGiAAIAAAxNYWNpbnRvc2ggSEQAAAAAAAAAAAAAAAAAAAAAAAAAQkQAAf////8fTmVzOThNb2RlbGxpbmcgd29yI0ZGRkZGRkZGLnBkZgAAAAAAAAAAAAAAAAAAAAAAAAAAAAAAAAAAAAAAAAAA/////wAAAAAAAAAAAAAAAAAIAAIAAAogY3UAAAAAAAAAAAAAAAAABnBhcGVycwACAEEvOlVzZXJzOndibHVtOkRvY3VtZW50czpwYXBlcnM6TmVzOThNb2RlbGxpbmcgd29yayBoYXJkZW5pbmcuLnBkZgAADgBGACIATgBlAHMAOQA4AE0AbwBkAGUAbABsAGkAbgBnACAAdwBvAHIAawAgAGgAYQByAGQAZQBuAGkAbgBnAC4ALgBwAGQAZgAPABoADABNAGEAYwBpAG4AdABvAHMAaAAgAEgARAASAD9Vc2Vycy93Ymx1bS9Eb2N1bWVudHMvcGFwZXJzL05lczk4TW9kZWxsaW5nIHdvcmsgaGFyZGVuaW5nLi5wZGYAABMAAS8AABUAAgAM//8AAAAIAA0AGgAkAGgAAAAAAAACAQAAAAAAAAAFAAAAAAAAAAAAAAAAAAACDg==},
	Bdsk-File-2 = {YnBsaXN0MDDSAQIDBFxyZWxhdGl2ZVBhdGhZYWxpYXNEYXRhXxA3Li4vLi4vLi4vLi4vLi4vLi4vLi4vLi4vcGFwZXJzL05lczk4LnNiLWZkMzU4YzQ3LWQ1Vm1yOE8RAXoAAAAAAXoAAgAADE1hY2ludG9zaCBIRAAAAAAAAAAAAAAAAAAAAAAAAABCRAAB/////xhOZXM5OC5zYi1mZDM1OGM0Ny1kNVZtcjgAAAAAAAAAAAAAAAAAAAAAAAAAAAAAAAAAAAAAAAAAAAAAAAAAAAD/////AAAAAAAAAAAAAAAAAAgAAgAACiBjdQAAAAAAAAAAAAAAAAAGcGFwZXJzAAIANy86VXNlcnM6d2JsdW06RG9jdW1lbnRzOnBhcGVyczpOZXM5OC5zYi1mZDM1OGM0Ny1kNVZtcjgAAA4AMgAYAE4AZQBzADkAOAAuAHMAYgAtAGYAZAAzADUAOABjADQANwAtAGQANQBWAG0AcgA4AA8AGgAMAE0AYQBjAGkAbgB0AG8AcwBoACAASABEABIANVVzZXJzL3dibHVtL0RvY3VtZW50cy9wYXBlcnMvTmVzOTguc2ItZmQzNThjNDctZDVWbXI4AAATAAEvAAAVAAIADP//AAAACAANABoAJABeAAAAAAAAAgEAAAAAAAAABQAAAAAAAAAAAAAAAAAAAdw=},
	Bdsk-File-3 = {YnBsaXN0MDDSAQIDBFxyZWxhdGl2ZVBhdGhZYWxpYXNEYXRhXxBHLi4vLi4vLi4vLi4vLi4vLi4vcGFwZXJzX2V4dGVybmFsL05lOTgvTmVzX0ZpbmFsIGVsZWN0cm9uaWMgdmVyc2lvbi5wZGZPEQHcAAAAAAHcAAIAAAxNYWNpbnRvc2ggSEQAAAAAAAAAAAAAAAAAAAAAAAAAQkQAAf////8fTmVzX0ZpbmFsIGVsZWN0cm9uI0ZGRkZGRkZGLnBkZgAAAAAAAAAAAAAAAAAAAAAAAAAAAAAAAAAAAAAAAAAA/////wAAAAAAAAAAAAAAAAAGAAMAAAogY3UAAAAAAAAAAAAAAAAABE5lOTgAAgBhLzpVc2Vyczp3Ymx1bTpEb2N1bWVudHM6VGV4dGU6UHVibGlrYXRpb25lbjpwYXBlcnNfZXh0ZXJuYWw6TmU5ODpOZXNfRmluYWwgZWxlY3Ryb25pYyB2ZXJzaW9uLnBkZgAADgBCACAATgBlAHMAXwBGAGkAbgBhAGwAIABlAGwAZQBjAHQAcgBvAG4AaQBjACAAdgBlAHIAcwBpAG8AbgAuAHAAZABmAA8AGgAMAE0AYQBjAGkAbgB0AG8AcwBoACAASABEABIAX1VzZXJzL3dibHVtL0RvY3VtZW50cy9UZXh0ZS9QdWJsaWthdGlvbmVuL3BhcGVyc19leHRlcm5hbC9OZTk4L05lc19GaW5hbCBlbGVjdHJvbmljIHZlcnNpb24ucGRmAAATAAEvAAAVAAIADP//AAAACAANABoAJABuAAAAAAAAAgEAAAAAAAAABQAAAAAAAAAAAAAAAAAAAk4=},
	Bdsk-File-4 = {YnBsaXN0MDDSAQIDBFxyZWxhdGl2ZVBhdGhZYWxpYXNEYXRhbxBRAC4ALgAvAC4ALgAvAC4ALgAvAC4ALgAvAC4ALgAvAC4ALgAvAC4ALgAvAFYAbwByAGgAYQBiAGUAbgAvAFAAbABhAHMAdABpAHoAaQB0AGEDCAB0AF8AWgBlAG4AZwAvAE4AZQBzAC8AVAByAGEAbgBmAGUAcgBfAE4AZQBzAF8AbQBvAGQAZQBsAF8AZQBuAGcAbABpAHMAaAAuAHAAZABmTxEBygAAAAABygACAAAMTWFjaW50b3NoIEhEAAAAAAAAAAAAAAAAAAAAAAAAAEJEAAH/////HVRyYW5mZXJfTmVzX21vZGVsX2VuZ2xpc2gucGRmAAAAAAAAAAAAAAAAAAAAAAAAAAAAAAAAAAAAAAAAAAAAAP////8AAAAAAAAAAAAAAAAABwAEAAAKIGN1AAAAAAAAAAAAAAAAAANOZXMAAAIAWy86VXNlcnM6d2JsdW06RG9jdW1lbnRzOlRleHRlOlZvcmhhYmVuOlBsYXN0aXppdGHMiHRfWmVuZzpOZXM6VHJhbmZlcl9OZXNfbW9kZWxfZW5nbGlzaC5wZGYAAA4APAAdAFQAcgBhAG4AZgBlAHIAXwBOAGUAcwBfAG0AbwBkAGUAbABfAGUAbgBnAGwAaQBzAGgALgBwAGQAZgAPABoADABNAGEAYwBpAG4AdABvAHMAaAAgAEgARAASAFlVc2Vycy93Ymx1bS9Eb2N1bWVudHMvVGV4dGUvVm9yaGFiZW4vUGxhc3Rpeml0YcyIdF9aZW5nL05lcy9UcmFuZmVyX05lc19tb2RlbF9lbmdsaXNoLnBkZgAAEwABLwAAFQACAAz//wAAAAgADQAaACQAyQAAAAAAAAIBAAAAAAAAAAUAAAAAAAAAAAAAAAAAAAKX},
	Bdsk-Url-1 = {http://dx.doi.org/10.1016/S0079-6425(97)00032-7}}

@article{KocMec03,
	Author = {Kocks, U.F. and Mecking, H.},
	Citation-Origin = {Li},
	Date-Added = {2019-08-22 10:46:14 +0200},
	Date-Modified = {2019-08-22 10:46:14 +0200},
	Doi = {10.1016/S0079-6425(02)00003-8},
	Journal = {Progr. Mater. Sci.},
	Local-Url = {file://localhost/Users/wblum/Documents/papers/KocMec03},
	Number = {3},
	Pages = {171-273},
	Title = {Physics and phenomenology of strain hardening: the {FCC} case},
	Volume = {48},
	Year = {2003},
	Bdsk-File-1 = {YnBsaXN0MDDSAQIDBFxyZWxhdGl2ZVBhdGhZYWxpYXNEYXRhXxArLi4vLi4vLi4vLi4vLi4vLi4vLi4vLi4vcGFwZXJzL0tvY01lYzAzLnBkZk8RAUoAAAAAAUoAAgAADE1hY2ludG9zaCBIRAAAAAAAAAAAAAAAAAAAAAAAAABCRAAB/////wxLb2NNZWMwMy5wZGYAAAAAAAAAAAAAAAAAAAAAAAAAAAAAAAAAAAAAAAAAAAAAAAAAAAAAAAAAAAAAAAAAAAD/////AAAAAAAAAAAAAAAAAAgAAgAACiBjdQAAAAAAAAAAAAAAAAAGcGFwZXJzAAIAKy86VXNlcnM6d2JsdW06RG9jdW1lbnRzOnBhcGVyczpLb2NNZWMwMy5wZGYAAA4AGgAMAEsAbwBjAE0AZQBjADAAMwAuAHAAZABmAA8AGgAMAE0AYQBjAGkAbgB0AG8AcwBoACAASABEABIAKVVzZXJzL3dibHVtL0RvY3VtZW50cy9wYXBlcnMvS29jTWVjMDMucGRmAAATAAEvAAAVAAIADP//AAAACAANABoAJABSAAAAAAAAAgEAAAAAAAAABQAAAAAAAAAAAAAAAAAAAaA=},
	Bdsk-Url-1 = {http://dx.doi.org/10.1016/S0079-6425(02)00003-8}}

@article{HaBl76b,
	Abstract = {Cylindrical specimens of Al-11wt%Zn were deformed at constant stress and
		at 523 K in tensile creep tests. The stress dependence of the steady state
		deformation rate ges, was determined from stress change tests, ges shows
		an exponential stress dependence in the stress range above 10 MPa. The
		steady state values of the dislocation density in the subgrain interior
		(i) and of the subgrain size were determined by means of transmission electron
		microscopy. The fundamental equation of steady state deformation ges =
		(b M)Agr- was tested by independent measurement of ges and gr-. A is of
		the order of the subgrain size. gr- was determined from the recovery behavior
		of the dislocation density immediately after steady state deformation.
		The shape of the recovery curves did not depend on type and amount of stress
		reduction but was strongly dependent on ges. These results were confirmed
		by measurements of the transient creep behavior after reloading the specimens
		with the initial load. For the exact determination of gr- an interpolation
		method was used, which is based on the decrease ofi during stress relaxation.
		The shape of the recovery curves and the stress dependence of ges.A and
		gr- suggest that recovery during and immediately after steady state deformation
		is of dynamic nature.},
	Annote = {15,HaBl76b},
	Author = {Hausselt, J. and Blum, W.},
	Date-Added = {2019-08-22 10:45:44 +0200},
	Date-Modified = {2019-08-22 10:45:44 +0200},
	Doi = {10.1016/0001-6160(76)90133-4},
	Journal = {Acta Metall.},
	Number = {11},
	Pages = {1027-1039},
	Title = {Dynamic recovery during and after steady state deformation of {A}l-11wt\%{Z}n},
	Volume = {24},
	Year = {1976},
	Bdsk-File-1 = {YnBsaXN0MDDSAQIDBFxyZWxhdGl2ZVBhdGhZYWxpYXNEYXRhXxBELi4vLi4vLi4vLi4vLi4vLi4vLi4vLi4vcGFwZXJzL0hhdUJsdTc2YUR5bmFtaWMgcmVjb3ZlcnkgZHVyaW5nLi5wZGZPEQGsAAAAAAGsAAIAAAxNYWNpbnRvc2ggSEQAAAAAAAAAAAAAAAAAAAAAAAAAQkQAAf////8fSGF1Qmx1NzZhRHluYW1pYyByI0ZGRkZGRkZGLnBkZgAAAAAAAAAAAAAAAAAAAAAAAAAAAAAAAAAAAAAAAAAA/////wAAAABQREYgQ0FSTwAIAAIAAAogY3UAAAAAAAAAAAAAAAAABnBhcGVycwACAEQvOlVzZXJzOndibHVtOkRvY3VtZW50czpwYXBlcnM6SGF1Qmx1NzZhRHluYW1pYyByZWNvdmVyeSBkdXJpbmcuLnBkZgAOAEwAJQBIAGEAdQBCAGwAdQA3ADYAYQBEAHkAbgBhAG0AaQBjACAAcgBlAGMAbwB2AGUAcgB5ACAAZAB1AHIAaQBuAGcALgAuAHAAZABmAA8AGgAMAE0AYQBjAGkAbgB0AG8AcwBoACAASABEABIAQlVzZXJzL3dibHVtL0RvY3VtZW50cy9wYXBlcnMvSGF1Qmx1NzZhRHluYW1pYyByZWNvdmVyeSBkdXJpbmcuLnBkZgATAAEvAAAVAAIADP//AAAACAANABoAJABrAAAAAAAAAgEAAAAAAAAABQAAAAAAAAAAAAAAAAAAAhs=},
	Bdsk-File-2 = {YnBsaXN0MDDSAQIDBFxyZWxhdGl2ZVBhdGhZYWxpYXNEYXRhXxBDLi4vLi4vLi4vLi4vLi4vLi4vLi4vLi4vcGFwZXJzL0hhdUJsdTc2RHluYW1pYyByZWNvdmVyeSBkdXJpbmcuLnBkZk8RAaoAAAAAAaoAAgAADE1hY2ludG9zaCBIRAAAAAAAAAAAAAAAAAAAAAAAAABCRAAB/////x9IYXVCbHU3NkR5bmFtaWMgcmUjRkZGRkZGRkYucGRmAAAAAAAAAAAAAAAAAAAAAAAAAAAAAAAAAAAAAAAAAAD/////AAAAAFBERiBDQVJPAAgAAgAACiBjdQAAAAAAAAAAAAAAAAAGcGFwZXJzAAIAQy86VXNlcnM6d2JsdW06RG9jdW1lbnRzOnBhcGVyczpIYXVCbHU3NkR5bmFtaWMgcmVjb3ZlcnkgZHVyaW5nLi5wZGYAAA4ASgAkAEgAYQB1AEIAbAB1ADcANgBEAHkAbgBhAG0AaQBjACAAcgBlAGMAbwB2AGUAcgB5ACAAZAB1AHIAaQBuAGcALgAuAHAAZABmAA8AGgAMAE0AYQBjAGkAbgB0AG8AcwBoACAASABEABIAQVVzZXJzL3dibHVtL0RvY3VtZW50cy9wYXBlcnMvSGF1Qmx1NzZEeW5hbWljIHJlY292ZXJ5IGR1cmluZy4ucGRmAAATAAEvAAAVAAIADP//AAAACAANABoAJABqAAAAAAAAAgEAAAAAAAAABQAAAAAAAAAAAAAAAAAAAhg=},
	Bdsk-Url-1 = {http://dx.doi.org/10.1016/0001-6160(76)90133-4}}

@article{Eis06,
	Annote = {http://www.gmp.ww.uni-erlangen.de/
show.php?navigation=SmooMuDS&article=
article SmooMuDS},
	Author = {P. Eisenlohr},
	Date-Added = {2019-08-22 10:44:44 +0200},
	Date-Modified = {2019-08-22 10:44:44 +0200},
	Doi = {10.13140/2.1.3636.2566},
	Journal = {http://www.gmp.ww.uni-erlangen.de/SmooMuDS\_engl.php},
	Local-Url = {/Users/wblum/Documents/Texte/Publikationen/papers_In_Arbeit/EisBlu09_smooth},
	Title = {Smoo{M}u{DS}: Flexible smoothing of multi-valued data series},
	Url = {http://www.gmp.ww.uni-erlangen.de/show.php?navigation=SmooMuDS\&article=article SmooMuDS},
	Urldate = {2005},
	Year = {2006},
	Bdsk-Url-1 = {http://www.gmp.ww.uni-erlangen.de/show.php?navigation=SmooMuDS&article=article%20SmooMuDS}}

@book{FrAs82,
	Address = {Oxford},
	Author = {Frost, H. J. and Ashby, M. F.},
	Citation-Origin = {Blum},
	Date-Added = {2019-08-22 10:44:02 +0200},
	Date-Modified = {2019-08-22 10:44:02 +0200},
	Publisher = {Pergamon Press},
	Title = {Deformation-Mechanism Maps},
	Year = {1982}}

@article{Blu19A-new-way-to-visualize-back-strain,
	Author = {Blum, W.},
	Date-Added = {2019-08-22 10:43:18 +0200},
	Date-Modified = {2019-08-22 10:43:18 +0200},
	Doi = {10.13140/RG.2.2.18688.69127/2},
	Journal = {RssearchGate},
	Keywords = {recovery strain, back flow},
	Local-Url = {/Users/wblum/Documents/Texte/Publikationen/papers_In_Arbeit/Blu19transient-all-in-one/},
	Title = {A new way to visualize back strain and recovery strain after stress reductions},
	Year = {2019},
	Bdsk-File-1 = {YnBsaXN0MDDSAQIDBFxyZWxhdGl2ZVBhdGhZYWxpYXNEYXRhXxBLLi4vLi4vLi4vLi4vLi4vLi4vLi4vLi4vcGFwZXJzL0JsdTE5QSBuZXcgd2F5IHRvIHZpc3VhbGl6ZSBiYWNrIHN0cmFpbi4ucGRmTxEBygAAAAABygACAAAMTWFjaW50b3NoIEhEAAAAAAAAAAAAAAAAAAAAAAAAAEJEAAH/////H0JsdTE5QSBuZXcgd2F5IHRvICNGRkZGRkZGRi5wZGYAAAAAAAAAAAAAAAAAAAAAAAAAAAAAAAAAAAAAAAAAAP////8AAAAAAAAAAAAAAAAACAACAAAKIGN1AAAAAAAAAAAAAAAAAAZwYXBlcnMAAgBLLzpVc2Vyczp3Ymx1bTpEb2N1bWVudHM6cGFwZXJzOkJsdTE5QSBuZXcgd2F5IHRvIHZpc3VhbGl6ZSBiYWNrIHN0cmFpbi4ucGRmAAAOAFoALABCAGwAdQAxADkAQQAgAG4AZQB3ACAAdwBhAHkAIAB0AG8AIAB2AGkAcwB1AGEAbABpAHoAZQAgAGIAYQBjAGsAIABzAHQAcgBhAGkAbgAuAC4AcABkAGYADwAaAAwATQBhAGMAaQBuAHQAbwBzAGgAIABIAEQAEgBJVXNlcnMvd2JsdW0vRG9jdW1lbnRzL3BhcGVycy9CbHUxOUEgbmV3IHdheSB0byB2aXN1YWxpemUgYmFjayBzdHJhaW4uLnBkZgAAEwABLwAAFQACAAz//wAAAAgADQAaACQAcgAAAAAAAAIBAAAAAAAAAAUAAAAAAAAAAAAAAAAAAAJA}}

@article{SunPetCer16-Grain-size-and,
	Annote = {VG Wort gemeldet},
	Author = {Sun, Z. and Van Petegem, S. and Cervellino, A. and Blum, W. and Van Swygenhoven, H.},
	Date-Added = {2019-08-22 10:41:57 +0200},
	Date-Modified = {2019-08-22 10:41:57 +0200},
	Doi = {http://dx.doi.org/10.1016/j.actamat.2016.08.019},
	Journal = {Acta mater.},
	Keywords = {nc Ni, nc Ni-Fe, multistep test},
	Pages = {104-114},
	Title = {Grain size and alloying effects on dynamic recovery in nanocrystalline metals},
	Volume = {119},
	Year = {2016},
	Bdsk-File-1 = {YnBsaXN0MDDSAQIDBFxyZWxhdGl2ZVBhdGhZYWxpYXNEYXRhXxBGLi4vLi4vLi4vLi4vLi4vLi4vLi4vLi4vcGFwZXJzL1N1blZhbkNlcjE2R3JhaW4gc2l6ZSBhbmQgYWxsb3lpbmcuLnBkZk8RAbQAAAAAAbQAAgAADE1hY2ludG9zaCBIRAAAAAAAAAAAAAAAAAAAAAAAAABCRAAB/////x9TdW5WYW5DZXIxNkdyYWluIHMjRkZGRkZGRkYucGRmAAAAAAAAAAAAAAAAAAAAAAAAAAAAAAAAAAAAAAAAAAD/////AAAAAAAAAAAAAAAAAAgAAgAACiBjdQAAAAAAAAAAAAAAAAAGcGFwZXJzAAIARi86VXNlcnM6d2JsdW06RG9jdW1lbnRzOnBhcGVyczpTdW5WYW5DZXIxNkdyYWluIHNpemUgYW5kIGFsbG95aW5nLi5wZGYADgBQACcAUwB1AG4AVgBhAG4AQwBlAHIAMQA2AEcAcgBhAGkAbgAgAHMAaQB6AGUAIABhAG4AZAAgAGEAbABsAG8AeQBpAG4AZwAuAC4AcABkAGYADwAaAAwATQBhAGMAaQBuAHQAbwBzAGgAIABIAEQAEgBEVXNlcnMvd2JsdW0vRG9jdW1lbnRzL3BhcGVycy9TdW5WYW5DZXIxNkdyYWluIHNpemUgYW5kIGFsbG95aW5nLi5wZGYAEwABLwAAFQACAAz//wAAAAgADQAaACQAbQAAAAAAAAIBAAAAAAAAAAUAAAAAAAAAAAAAAAAAAAIl},
	Bdsk-File-2 = {YnBsaXN0MDDSAQIDBFxyZWxhdGl2ZVBhdGhZYWxpYXNEYXRhXxBKLi4vLi4vLi4vLi4vLi4vLi4vLi4vLi4vcGFwZXJzL1N1blBldENlcjE2LUdyYWluc2l6ZWFuZGFsbG95aW5nZWZmZWN0cy5wZGZPEQHEAAAAAAHEAAIAAAxNYWNpbnRvc2ggSEQAAAAAAAAAAAAAAAAAAAAAAAAAQkQAAf////8fU3VuUGV0Q2VyMTYtR3JhaW5zI0ZGRkZGRkZGLnBkZgAAAAAAAAAAAAAAAAAAAAAAAAAAAAAAAAAAAAAAAAAA/////wAAAAAAAAAAAAAAAAAIAAIAAAogY3UAAAAAAAAAAAAAAAAABnBhcGVycwACAEovOlVzZXJzOndibHVtOkRvY3VtZW50czpwYXBlcnM6U3VuUGV0Q2VyMTYtR3JhaW5zaXplYW5kYWxsb3lpbmdlZmZlY3RzLnBkZgAOAFgAKwBTAHUAbgBQAGUAdABDAGUAcgAxADYALQBHAHIAYQBpAG4AcwBpAHoAZQBhAG4AZABhAGwAbABvAHkAaQBuAGcAZQBmAGYAZQBjAHQAcwAuAHAAZABmAA8AGgAMAE0AYQBjAGkAbgB0AG8AcwBoACAASABEABIASFVzZXJzL3dibHVtL0RvY3VtZW50cy9wYXBlcnMvU3VuUGV0Q2VyMTYtR3JhaW5zaXplYW5kYWxsb3lpbmdlZmZlY3RzLnBkZgATAAEvAAAVAAIADP//AAAACAANABoAJABxAAAAAAAAAgEAAAAAAAAABQAAAAAAAAAAAAAAAAAAAjk=}}

@article{SunPetCer15Dynamic-recovery-in-nanocrystalline,
	Annote = {VG Wort gemeldet},
	Author = {Z. Sun and S. Van Petegem and A. Cervellino and K. Durst and W. Blum and H. Van Swygenhoven},
	Date-Added = {2019-08-22 10:41:16 +0200},
	Date-Modified = {2019-08-22 10:41:16 +0200},
	Doi = {http://dx.doi.org/10.1016/j.actamat.2015.03.033},
	Journal = {Acta Materialia},
	Keywords = {nc Ni},
	Pages = {91--100},
	Title = {Dynamic recovery in nanocrystalline {N}i},
	Volume = {91},
	Year = {2015},
	Bdsk-File-1 = {YnBsaXN0MDDSAQIDBFxyZWxhdGl2ZVBhdGhZYWxpYXNEYXRhXxBTLi4vLi4vLi4vLi4vLi4vLi4vLi4vLi4vcGFwZXJzL1N1blBldENlcjE1YUR5bmFtaWMgcmVjb3ZlcnkgaW4gbmFub2NyeXN0YWxsaW5lLi5wZGZPEQHqAAAAAAHqAAIAAAxNYWNpbnRvc2ggSEQAAAAAAAAAAAAAAAAAAAAAAAAAQkQAAf////8fU3VuUGV0Q2VyMTVhRHluYW1pI0ZGRkZGRkZGLnBkZgAAAAAAAAAAAAAAAAAAAAAAAAAAAAAAAAAAAAAAAAAA/////wAAAAAAAAAAAAAAAAAIAAIAAAogY3UAAAAAAAAAAAAAAAAABnBhcGVycwACAFMvOlVzZXJzOndibHVtOkRvY3VtZW50czpwYXBlcnM6U3VuUGV0Q2VyMTVhRHluYW1pYyByZWNvdmVyeSBpbiBuYW5vY3J5c3RhbGxpbmUuLnBkZgAADgBqADQAUwB1AG4AUABlAHQAQwBlAHIAMQA1AGEARAB5AG4AYQBtAGkAYwAgAHIAZQBjAG8AdgBlAHIAeQAgAGkAbgAgAG4AYQBuAG8AYwByAHkAcwB0AGEAbABsAGkAbgBlAC4ALgBwAGQAZgAPABoADABNAGEAYwBpAG4AdABvAHMAaAAgAEgARAASAFFVc2Vycy93Ymx1bS9Eb2N1bWVudHMvcGFwZXJzL1N1blBldENlcjE1YUR5bmFtaWMgcmVjb3ZlcnkgaW4gbmFub2NyeXN0YWxsaW5lLi5wZGYAABMAAS8AABUAAgAM//8AAAAIAA0AGgAkAHoAAAAAAAACAQAAAAAAAAAFAAAAAAAAAAAAAAAAAAACaA==},
	Bdsk-File-2 = {YnBsaXN0MDDSAQIDBFxyZWxhdGl2ZVBhdGhZYWxpYXNEYXRhXxBSLi4vLi4vLi4vLi4vLi4vLi4vLi4vLi4vcGFwZXJzL1N1blBldENlcjE1RHluYW1pYyByZWNvdmVyeSBpbiBuYW5vY3J5c3RhbGxpbmUuLnBkZk8RAeQAAAAAAeQAAgAADE1hY2ludG9zaCBIRAAAAAAAAAAAAAAAAAAAAAAAAABCRAAB/////x9TdW5QZXRDZXIxNUR5bmFtaWMjRkZGRkZGRkYucGRmAAAAAAAAAAAAAAAAAAAAAAAAAAAAAAAAAAAAAAAAAAD/////AAAAAAAAAAAAAAAAAAgAAgAACiBjdQAAAAAAAAAAAAAAAAAGcGFwZXJzAAIAUi86VXNlcnM6d2JsdW06RG9jdW1lbnRzOnBhcGVyczpTdW5QZXRDZXIxNUR5bmFtaWMgcmVjb3ZlcnkgaW4gbmFub2NyeXN0YWxsaW5lLi5wZGYADgBoADMAUwB1AG4AUABlAHQAQwBlAHIAMQA1AEQAeQBuAGEAbQBpAGMAIAByAGUAYwBvAHYAZQByAHkAIABpAG4AIABuAGEAbgBvAGMAcgB5AHMAdABhAGwAbABpAG4AZQAuAC4AcABkAGYADwAaAAwATQBhAGMAaQBuAHQAbwBzAGgAIABIAEQAEgBQVXNlcnMvd2JsdW0vRG9jdW1lbnRzL3BhcGVycy9TdW5QZXRDZXIxNUR5bmFtaWMgcmVjb3ZlcnkgaW4gbmFub2NyeXN0YWxsaW5lLi5wZGYAEwABLwAAFQACAAz//wAAAAgADQAaACQAeQAAAAAAAAIBAAAAAAAAAAUAAAAAAAAAAAAAAAAAAAJh}}

@article{KapLiWanBlu06,
	Abstract = {Stress change tests were conducted on ultrafine-grained Cu in a region where
		the grain size is smaller than the steady state subgrain size. After stress
		reduction the normal creep transients were absent, confirming subgrain
		strengthening in conventional grain-sized materials and a lack of steady
		state subgrain structure in the ultrafine-grained materials.},
	Annote = {244

ISSN 1359-6462},
	Author = {Kapoor, R. and Li, Y.J. and Wang, J.T. and Blum, W.},
	Date-Added = {2019-08-22 10:40:33 +0200},
	Date-Modified = {2019-08-22 10:40:33 +0200},
	Doi = {10.1016/j.scriptamat.2006.01.032},
	Journal = {Scripta mater.},
	Local-Url = {/Users/wblum/Documents/Texte/Publikationen/papers/KapLiWanBlu06_ufg_transients_244/},
	Pages = {1803-1807},
	Title = {Creep transients during stress changes in ultrafine-grained copper},
	Volume = {54},
	Year = {2006},
	Bdsk-File-1 = {YnBsaXN0MDDSAQIDBFxyZWxhdGl2ZVBhdGhZYWxpYXNEYXRhXxAtLi4vLi4vLi4vLi4vLi4vLi4vLi4vLi4vcGFwZXJzL0thcExpV2FuMDYucGRmTxEBUgAAAAABUgACAAAMTWFjaW50b3NoIEhEAAAAAAAAAAAAAAAAAAAAAAAAAEJEAAH/////DkthcExpV2FuMDYucGRmAAAAAAAAAAAAAAAAAAAAAAAAAAAAAAAAAAAAAAAAAAAAAAAAAAAAAAAAAAAAAAAAAP////8AAAAAAAAAAAAAAAAACAACAAAKIGN1AAAAAAAAAAAAAAAAAAZwYXBlcnMAAgAtLzpVc2Vyczp3Ymx1bTpEb2N1bWVudHM6cGFwZXJzOkthcExpV2FuMDYucGRmAAAOAB4ADgBLAGEAcABMAGkAVwBhAG4AMAA2AC4AcABkAGYADwAaAAwATQBhAGMAaQBuAHQAbwBzAGgAIABIAEQAEgArVXNlcnMvd2JsdW0vRG9jdW1lbnRzL3BhcGVycy9LYXBMaVdhbjA2LnBkZgAAEwABLwAAFQACAAz//wAAAAgADQAaACQAVAAAAAAAAAIBAAAAAAAAAAUAAAAAAAAAAAAAAAAAAAGq},
	Bdsk-File-2 = {YnBsaXN0MDDSAQIDBFxyZWxhdGl2ZVBhdGhZYWxpYXNEYXRhXxBJLi4vLi4vLi4vLi4vLi4vS2FwTGlXYW5CbHUwNl91ZmdfdHJhbnNpZW50c18yNDQvcmVwcmludC9LYXBMaVdhbkJsdTA2LnBkZk8RAe4AAAAAAe4AAgAADE1hY2ludG9zaCBIRAAAAAAAAAAAAAAAAAAAAAAAAABCRAAB/////xFLYXBMaVdhbkJsdTA2LnBkZgAAAAAAAAAAAAAAAAAAAAAAAAAAAAAAAAAAAAAAAAAAAAAAAAAAAAAAAAAAAAD/////AAAAAAAAAAAAAAAAAAUAAwAACiBjdQAAAAAAAAAAAAAAAAAHcmVwcmludAAAAgB3LzpVc2Vyczp3Ymx1bTpEb2N1bWVudHM6VGV4dGU6UHVibGlrYXRpb25lbjpwYXBlcnNfSW5fQXJiZWl0OkthcExpV2FuQmx1MDZfdWZnX3RyYW5zaWVudHNfMjQ0OnJlcHJpbnQ6S2FwTGlXYW5CbHUwNi5wZGYAAA4AJAARAEsAYQBwAEwAaQBXAGEAbgBCAGwAdQAwADYALgBwAGQAZgAPABoADABNAGEAYwBpAG4AdABvAHMAaAAgAEgARAASAHVVc2Vycy93Ymx1bS9Eb2N1bWVudHMvVGV4dGUvUHVibGlrYXRpb25lbi9wYXBlcnNfSW5fQXJiZWl0L0thcExpV2FuQmx1MDZfdWZnX3RyYW5zaWVudHNfMjQ0L3JlcHJpbnQvS2FwTGlXYW5CbHUwNi5wZGYAABMAAS8AABUAAgAM//8AAAAIAA0AGgAkAHAAAAAAAAACAQAAAAAAAAAFAAAAAAAAAAAAAAAAAAACYg==},
	Bdsk-Url-1 = {http://dx.doi.org/10.1016/j.scriptamat.2006.01.032}}

@article{Bl84,
	Annote = {46},
	Author = {Blum, W.},
	Date-Added = {2019-08-22 10:39:45 +0200},
	Date-Modified = {2019-08-22 10:39:45 +0200},
	Doi = {10.1016/0036-9748(84)90370-3},
	Journal = {Scripta metall.},
	Number = {12},
	Pages = {1383-1388},
	Title = {On the Evolution of the Dislocation Structure during Work Hardening and Creep},
	Volume = {18},
	Year = {1984},
	Bdsk-File-1 = {YnBsaXN0MDDSAQIDBFxyZWxhdGl2ZVBhdGhZYWxpYXNEYXRhXxBVLi4vLi4vLi4vLi4vLi4vLi4vLi4vLi4vcGFwZXJzL0JsdTg0T24gdGhlIEV2b2x1dGlvbiBvZiB0aGUgRGlzbG9jYXRpb24gU3RydWN0dXJlLnBkZk8RAfIAAAAAAfIAAgAADE1hY2ludG9zaCBIRAAAAAAAAAAAAAAAAAAAAAAAAABCRAAB/////x9CbHU4NE9uIHRoZSBFdm9sdXQjRkZGRkZGRkYucGRmAAAAAAAAAAAAAAAAAAAAAAAAAAAAAAAAAAAAAAAAAAD/////AAAAAAAAAAAAAAAAAAgAAgAACiBjdQAAAAAAAAAAAAAAAAAGcGFwZXJzAAIAVS86VXNlcnM6d2JsdW06RG9jdW1lbnRzOnBhcGVyczpCbHU4NE9uIHRoZSBFdm9sdXRpb24gb2YgdGhlIERpc2xvY2F0aW9uIFN0cnVjdHVyZS5wZGYAAA4AbgA2AEIAbAB1ADgANABPAG4AIAB0AGgAZQAgAEUAdgBvAGwAdQB0AGkAbwBuACAAbwBmACAAdABoAGUAIABEAGkAcwBsAG8AYwBhAHQAaQBvAG4AIABTAHQAcgB1AGMAdAB1AHIAZQAuAHAAZABmAA8AGgAMAE0AYQBjAGkAbgB0AG8AcwBoACAASABEABIAU1VzZXJzL3dibHVtL0RvY3VtZW50cy9wYXBlcnMvQmx1ODRPbiB0aGUgRXZvbHV0aW9uIG9mIHRoZSBEaXNsb2NhdGlvbiBTdHJ1Y3R1cmUucGRmAAATAAEvAAAVAAIADP//AAAACAANABoAJAB8AAAAAAAAAgEAAAAAAAAABQAAAAAAAAAAAAAAAAAAAnI=},
	Bdsk-Url-1 = {http://dx.doi.org/10.1016/0036-9748(84)90370-3}}

@article{BlNi81,
	Annote = {31},
	Author = {Blum, W. and Nix, W. D.},
	Date-Added = {2019-08-22 10:39:00 +0200},
	Date-Modified = {2019-08-22 10:39:00 +0200},
	Journal = {Res mechanica letters},
	Pages = {235-240},
	Title = {Strain associated with recovery},
	Volume = {1},
	Year = {1981},
	Bdsk-File-1 = {YnBsaXN0MDDSAQIDBFxyZWxhdGl2ZVBhdGhZYWxpYXNEYXRhXxBCLi4vLi4vLi4vLi4vLi4vLi4vLi4vLi4vcGFwZXJzL0JsdU5peDgxU3RyYWluIGFzc29jaWF0ZWQgd2l0aC4ucGRmTxEBpAAAAAABpAACAAAMTWFjaW50b3NoIEhEAAAAAAAAAAAAAAAAAAAAAAAAAEJEAAH/////H0JsdU5peDgxU3RyYWluIGFzcyNGRkZGRkZGRi5wZGYAAAAAAAAAAAAAAAAAAAAAAAAAAAAAAAAAAAAAAAAAAP////8AAAAAUERGIENBUk8ACAACAAAKIGN1AAAAAAAAAAAAAAAAAAZwYXBlcnMAAgBCLzpVc2Vyczp3Ymx1bTpEb2N1bWVudHM6cGFwZXJzOkJsdU5peDgxU3RyYWluIGFzc29jaWF0ZWQgd2l0aC4ucGRmAA4ASAAjAEIAbAB1AE4AaQB4ADgAMQBTAHQAcgBhAGkAbgAgAGEAcwBzAG8AYwBpAGEAdABlAGQAIAB3AGkAdABoAC4ALgBwAGQAZgAPABoADABNAGEAYwBpAG4AdABvAHMAaAAgAEgARAASAEBVc2Vycy93Ymx1bS9Eb2N1bWVudHMvcGFwZXJzL0JsdU5peDgxU3RyYWluIGFzc29jaWF0ZWQgd2l0aC4ucGRmABMAAS8AABUAAgAM//8AAAAIAA0AGgAkAGkAAAAAAAACAQAAAAAAAAAFAAAAAAAAAAAAAAAAAAACEQ==},
	Bdsk-File-2 = {YnBsaXN0MDDSAQIDBFxyZWxhdGl2ZVBhdGhZYWxpYXNEYXRhXxBDLi4vLi4vLi4vLi4vLi4vLi4vLi4vLi4vcGFwZXJzL0JsdU5peDgxYVN0cmFpbiBhc3NvY2lhdGVkIHdpdGguLnBkZk8RAaoAAAAAAaoAAgAADE1hY2ludG9zaCBIRAAAAAAAAAAAAAAAAAAAAAAAAABCRAAB/////x9CbHVOaXg4MWFTdHJhaW4gYXMjRkZGRkZGRkYucGRmAAAAAAAAAAAAAAAAAAAAAAAAAAAAAAAAAAAAAAAAAAD/////AAAAAFBERiBDQVJPAAgAAgAACiBjdQAAAAAAAAAAAAAAAAAGcGFwZXJzAAIAQy86VXNlcnM6d2JsdW06RG9jdW1lbnRzOnBhcGVyczpCbHVOaXg4MWFTdHJhaW4gYXNzb2NpYXRlZCB3aXRoLi5wZGYAAA4ASgAkAEIAbAB1AE4AaQB4ADgAMQBhAFMAdAByAGEAaQBuACAAYQBzAHMAbwBjAGkAYQB0AGUAZAAgAHcAaQB0AGgALgAuAHAAZABmAA8AGgAMAE0AYQBjAGkAbgB0AG8AcwBoACAASABEABIAQVVzZXJzL3dibHVtL0RvY3VtZW50cy9wYXBlcnMvQmx1Tml4ODFhU3RyYWluIGFzc29jaWF0ZWQgd2l0aC4ucGRmAAATAAEvAAAVAAIADP//AAAACAANABoAJABqAAAAAAAAAgEAAAAAAAAABQAAAAAAAAAAAAAAAAAAAhg=}}

@article{TaAr76,
	Author = {Takeuchi, S. and Argon, A.S.},
	Citation-Origin = {Blum},
	Date-Added = {2019-08-22 10:38:14 +0200},
	Date-Modified = {2019-08-22 10:38:14 +0200},
	Journal = {Acta Metall.},
	Pages = {883-889},
	Title = {Steady-state creep of alloys due to viscous motion of dislocations},
	Volume = {24},
	Year = {1976}}

@article{DvoBluKra19Quasi-stationary-strength-and-strain,
	Author = {Dvo\v{r}\'ak, J. and Blum, W. and Kr\'al, P. and Skleni\v{c}ka, V.},
	Date-Added = {2019-08-22 10:34:45 +0200},
	Date-Modified = {2019-08-22 10:34:45 +0200},
	Journal = {to be published},
	Keywords = {Cu-Zr, UFG, ECAP, grain boundary diffusion,},
	Local-Url = {/Users/wblum/Documents/Texte/Publikationen/papers_In_Arbeit/Sklenicka2011/Cu-Zr/papers/paperQS},
	Title = {Quasi-stationary strength and strain softening of {Cu-Zr} after predeformation by {ECAP}},
	Year = {2019},
	Bdsk-File-1 = {YnBsaXN0MDDSAQIDBFxyZWxhdGl2ZVBhdGhZYWxpYXNEYXRhXxBTLi4vLi4vLi4vLi4vLi4vLi4vLi4vLi4vcGFwZXJzL0R2b0JsdUtyYTE5UXVhc2ktc3RhdGlvbmFyeSBzdHJlbmd0aCBhbmQgc3RyYWluLi5wZGZPEQHqAAAAAAHqAAIAAAxNYWNpbnRvc2ggSEQAAAAAAAAAAAAAAAAAAAAAAAAAQkQAAf////8fRHZvQmx1S3JhMTlRdWFzaS1zI0ZGRkZGRkZGLnBkZgAAAAAAAAAAAAAAAAAAAAAAAAAAAAAAAAAAAAAAAAAA/////wAAAAAAAAAAAAAAAAAIAAIAAAogY3UAAAAAAAAAAAAAAAAABnBhcGVycwACAFMvOlVzZXJzOndibHVtOkRvY3VtZW50czpwYXBlcnM6RHZvQmx1S3JhMTlRdWFzaS1zdGF0aW9uYXJ5IHN0cmVuZ3RoIGFuZCBzdHJhaW4uLnBkZgAADgBqADQARAB2AG8AQgBsAHUASwByAGEAMQA5AFEAdQBhAHMAaQAtAHMAdABhAHQAaQBvAG4AYQByAHkAIABzAHQAcgBlAG4AZwB0AGgAIABhAG4AZAAgAHMAdAByAGEAaQBuAC4ALgBwAGQAZgAPABoADABNAGEAYwBpAG4AdABvAHMAaAAgAEgARAASAFFVc2Vycy93Ymx1bS9Eb2N1bWVudHMvcGFwZXJzL0R2b0JsdUtyYTE5UXVhc2ktc3RhdGlvbmFyeSBzdHJlbmd0aCBhbmQgc3RyYWluLi5wZGYAABMAAS8AABUAAgAM//8AAAAIAA0AGgAkAHoAAAAAAAACAQAAAAAAAAAFAAAAAAAAAAAAAAAAAAACaA==}}
